# Supplementary material for: SDFA: A Standardized Decomposition Format and Toolkit for Efficient Analysis of Structural Variants in Large-scale Population Genomic Studies
Source: Research Square preprint supplement (doi:10.21203/rs.3.rs-5058112/v1), 2025-05-27
Supplement: Supplementary file 1 [file 33ecd74206b489d075cd9b2c.xlsx]

## Sheet: Contents
	CONTENTS
		Chapter I: Performance comparison of SDFA and peer tools on compression, SV merge and SV annotation.
			Table S1: The number of different SV types in the original 1100 VCF files and SDF files
			Table S2: Comparison of SV extraction performance between SDF and other tools on different call SV methods' datasets.
			Table S3: Comparison of SV merge performance of SDFA and other peer tools.
			Table S4: Comparison of annotation performance between SDFA and other annotation tools on public dataset.
			Table S5: SDFA application for 150k UK Biobank SV data
			Table S6: The number of merged SVs in each subset of the two trios

## Sheet: Table S1
	Table S1:	The number of different SV types in the original 1100 VCF files and SDF files
	SV Type			SV Count	Standardized Decomposition SV Count By SDFA
	BND			13687416	13687416
	DEL			34798459	34798459
	DEL+DUP			3910	7820
	DEL+DUP+tDUP			68	204
	DEL+INV			2769	5538
	DEL+INV+DUP			901	2703
	DEL+INV+DUP+tDUP			6	24
	DEL+INV+tDUP			54	162
	DEL+tDUP			1867	3734
	DUP			2304221	2304221
	DUP+tDUP			2459	4918
	DUP:INT			3833	3833
	DUP:TANDEM			600122	600122
	INS			216311155	216311155
	INS+DUP			9989	19978
	INS+DUP+tDUP			5921	17763
	INS+INV			6497	12994
	INS+INV+DUP			4828	14484
	INS+INV+DUP+tDUP			1229	4916
	INS+INV+tDUP			3813	11439
	INS+INV+tDUP+tDUP			117	468
	INS+tDUP			163639	327278
	INS+tDUP+tDUP			13508	40524
	INV			476704	476704
	INV+DUP			33373	66746
	INV+DUP+tDUP			373	1119
	INV+tDUP			9044	18088
	INV+tDUP+tDUP			42	126
	TRA			51241	102482
	CNV			13911	13911
	tDUP			68356	68356
	tDUP+tDUP			2400	4800

## Sheet: Table S2
	Table S2:	Comparison of SV extraction performance between SDFA and other tools on different call SV methods' datasets.
	Dataset		Dimemsion			VCF Size [GB]	Parse Time [second]						Parse Speed [variants/sencond]						Compressed files size [GB]							Compression Ratio [%]
			Subjects	Number of Structural Variants	Number of Complex Structural Variants		pyvcf	StructureVariation Annotation	Truvari	ANNOVAR	SDFA (1 threads)	SDFA (4 threads)	pyvcf	StructureVariation Annotation	Truvari	ANNOVAR	SDFA (1 threads)	SDFA (4 threads)	GZ	BGZ	Truvari	SDF Mode_0	SDF Mode_1	SDF Mode_2	SDF Mode_3	GZ	Truvari	BGZ	SDF Mode_0	SDF Mode_1	SDF Mode_2	SDF Mode_3
	cuteSV2 calling		125	18718233	263,939 (BND)	6	762.818	582.402	821.774	162.25	96.6522	36.4478	24538.3	32139.7	22777.8	115367	193666	513563	1.2	1.303	1.2	1.1	1.1	1.1	0.985352	20	20	21.7167	18.3333	18.3333	18.3333	16.4225
	debreak calling		125	5483710	51,241 (TRA)	0.644531	135.19	128.73507 [89 missing]	199.9	45.93	19.2011	6.5538	40563	.	27432.3	119393	285594	836722	0.0898438	0.0917969	0.274414	0.0605469	0.0605469	0.0605469	0.0517578	13.9394	42.5758	14.2424	9.39394	9.39394	9.39394	8.0303
	delly calling		100	3670226	0	8.1	239.944	223.05	467.088	63.894	82.9606	29.1078	15296.2	16454.7	7857.68	57442.4	44240.6	126091	1.9	1.965	2	2	2	2	1.9	23.4568	24.6914	24.2593	24.6914	24.6914	24.6914	23.4568
	NanoSV calling		100	7231408	2,590,511 (BND)	24	857.243	646.11187 [2 missing]	1123.49	106.73	202.734	71.9225	8435.66	22831.9	6436.58	67754.2	35669.5	100544	4.9	5.2	8.6	3.4	2.8	2.7	2.7	20.4167	35.8333	21.6667	14.1667	11.6667	11.25	11.25
	nanovar calling		75	2505814	113,010 (BND)	0.283203	72.262	92.4302	91.7211	23.6798	10.5022	4.41333	34676.8	27110.3	27319.9	105821	238600	567783	0.0693359	0.0712891	0.144531	0.0595703	0.0576172	0.0576172	0.0517578	24.4828	51.0345	25.1724	21.0345	20.3448	20.3448	18.2759
	pbsv calling		100	3571404	205,828 (BND)	1.5	97.101[10 missing]	157.063314 [10 missing]	147.7945 [10 misising]	6.2807	21.1523	7.41629	not available	not available	not available	568632	168842	481562	0.316406	0.327148	not available	0.292969	0.301758	0.299805	0.279297	21.0938	not available	21.8099	19.5312	20.1172	19.987	18.6198
	picky calling		100	7262854	3,639,980 (BND)	5.3	not available	not available	not available	51.811	74.3701	28.5674	not available	not available	not available	140180	97658.3	254236	1.3	1.4	not available	1.1	0.891602	0.881836	0.890625	24.5283	not available	26.4151	20.7547	16.8227	16.6384	16.8042
	sniffles2 calling		125	6315388	24,071 (BND)	3	242.651	256.827	315.434	71.84	46.0035	14.8829	26026.6	24590.1	20021.3	87909.1	137281	424339	0.635742	0.65918	0.417969	0.591797	0.550781	0.549805	0.560547	21.1914	13.9323	21.9727	19.7266	18.3594	18.3268	18.6849
	svim calling		125	200537445	6,850,080 (BND)	25	5107.54	2503.38	5687.27	1238.33	670.322	438.582	39263	80106.7	35260.8	161942	299166	457241	2.8	2.9	9.5	1.9	1.9	1.9	1.9	11.2	38	11.6	7.6	7.6	7.6	7.6
	svision calling		125	13285743	266,807 (CSV)	5.4	558.382	255.802	598.964	103.487	78.1501	27.7548	23793.3	not available	22181.2	128381	170003	478683	1.1	1.1	1.9	0.875	0.875	0.873047	0.837891	20.3704	35.1852	20.3704	16.2037	16.2037	16.1675	15.5165
	Note: 1. All experiments were conducted on a personal computer with the following specifications: 32GB 2400 MHz DDR4 memory, Intel Core i7-11700 2.5 GHz 8 cores processor. 2. Among tools, pyvcf, StructureVairiationAnnotation and Truvari encountered errors in files called by pbsv and picky. Besides, StructureVariationAnnotation will drop 89 files by debreak, two files by NanoSV and all files by sv…
	Availability of Data: 1. The 1100 VCF files in this paper is shown in the https://zenodo.org/records/13293672, which do not require access rights. 2. More details about raw dataset are in Supplementary Note 1.

## Sheet: Table S3
	Table S3:	Comparison of SV merge performance of SDFA and other peer tools.
	Dataset		No. of Threads	Merge Time [second]					Maximum Memory Size Occupied [MB]
				Jasmine	SUVIVOR	svimmer	Truvari	SDFA	Jasmine	SUVIVOR	svimmer	Truvari	SDFA
	46 samples		1	283.274	126.386	230.783	491.597	36.105	283.274	2117.89	1474.88	571.031	2184.54
			4	184.854	-	-	-	16.041	184.854	-	-	-	2322.7
	92 samples (2 copies of 46 samples)		1	863.923	252.938	734.422	587.712	70.199	863.923	3687.34	2506.18	1021.59	2767.35
			4	438	-	-	-	32.106	438	-	-	-	3062.85
	184 samples (4 copies of 46 samples)		1	2846.04	498.267	2593.19	ERROR	144.42	2846.04	6950.32	4523.49	ERROR	3578.48
			4	1188.97	-	-	-	60.19	1188.97	-	-	-	3767.75
	368 samples (8 copies of 46 samples)		1	ERROR	1032.26	9102.08	ERROR	288.802	ERROR	13261.2	8146.98	ERROR	2242.57
			4	ERROR	-	-	-	122.379	ERRPR	-	-	-	5392.48
	736 samples (16 copies of 46 samples)		1	ERROR	2114.19	37290.1	ERROR	572.048	ERRPR	26032	15749.4	ERROR	7018.6
			4	ERROR	-	-	-	246.779	ERRPR	-	-	-	8648.2
	Note: 1. All experiments were conducted on a personal computer with the following specifications: 32GB 2400 MHz DDR4 memory, Intel Core i7-11700 2.5 GHz 8 cores processor. 2. Jasmine encounters an out-of-memory error when merging 368 samples. Truvari encounters errors when merging more than 184 gz files using bcftools. 3. This study used the psrecord, a python tool, to monitor CPU and memory usag…
	Availability of Data: Other datasets are obtained by different numbers of copies based on 46 samples.

## Sheet: Table S4
	Table S4:	Comparison of annotation performance between SDFA and other annotation tools on public dataset.
	Dataset		Dimemsion of Variants	Gene Annotation time in different software [second]				Multi-annotation resources annotation time [second]
				annoVcf	ANNOVAR	SDFA (1 thread)	SDFA (4 threads)	AnnotSV	SDFA (1 thread)	SDFA (4 threads)
	1100 samples		81375349	19678.642 [110 files missing]	5615.464 [133 files missing]	1226.3	561.922	>> 373153.426 (finish annotation 835 files)	9123.67	2065.91
	Note: 1. All experiments were conducted on a personal computer with the following specifications: 32GB 2400 MHz DDR4 memory, Intel Core i7-11700 2.5 GHz 8 cores processor. 2. In the process of annotation, annoVcf and ANNOVAR encountered errors respectively in 110 and 133 files. 3. Considering AnnotSV has been annotated for quite a long time, we closed the annotation task when 835 file annotations…
	Availability of Data: 1. The 1100 VCF files in this paper is shown in the https://zenodo.org/records/13293672, which do not require access rights. 2. More details about raw dataset are in Supplementary Notes S1.

## Sheet: Table S5
	Table S5:	SDFA application for 150k UK Biobank SV data
	Chromosome Name		Dimemsions			Full Extraction				Extraction With Filter
			File Number	All Files Size(GB)	Variatnts Number	ExtractionTime [seconds]	SV Type Number			ExtractionTime [seconds]	Filter Count			All Files Size(MB)
							DEL	INS	DUP		DP	GQ	HWE
	1		249	43	90380	10198.2	60523	15129	14728	3395.9	408529223	172124935	16818	351
	2		243	32	67326	7732.96	50581	15454	1291	2620	638853481	257935794	10851	282
	3		199	26	55911	6406.04	41831	12978	1102	2195.36	475996416	189835006	8120	228
	4		191	25	53188	6147.81	39137	13136	915	2029	502441986	187051792	8223	222
	5		182	28	51689	6143.86	38875	11750	1064	2142.15	477752820	187009472	8301	210
	6		171	23	48797	5596.04	36407	11497	893	1895.19	449883229	183224356	7815	211
	7		160	25	52063	6007.62	40410	10473	1180	2016.13	490865565	209311397	8685	209
	8		146	20	42737	4916.96	32544	9457	736	1648.14	383739149	156247474	6691	172
	9		139	17	36636	4226.19	28146	7750	740	1424.37	325120719	134830625	5743	150
	10		134	19	39323	4554.04	29876	8627	820	1538.49	391841997	170896664	6969	169
	11		136	19	40205	4664.05	30787	8564	854	1568.93	366635858	156579606	6388	161
	12		134	20	41727	4960.68	31914	8941	872	1611.5	402553674	170888124	7122	169
	13		115	14	28085	3192.7	20484	7036	565	1054	306074756	112385775	5047	122
	14		108	12	26027	2951.77	19325	6129	573	970.813	253521588	101664344	4328	107
	15		102	11	22700	2581.69	16868	5339	493	1163.93	243545277	94251212	4034	101
	16		91	15	30840	3536.89	24938	5179	723	1242.39	286147816	132266420	5273	118
	17		84	17	31250	3684.69	23797	5472	1981	860.301	311628685	161913876	7242	131
	18		81	10	21925	2509.87	16385	5129	411	847.897	212481447	87956212	3618	95
	19		59	16	29581	3520.24	24521	4050	1010	1131.78	270380175	155634734	5731	118
	20		65	11	22533	2606.93	17807	4071	655	872.442	202995619	104398875	4066	94
	21		47	6.8	12667	1458.35	9555	2614	498	487.373	133932767	63157731	2656	54
	22		51	8.2	15261	1799.07	12221	2525	515	586.127	156928386	85223913	3378	65
	X		157	17	34203	3981.91	26727	6683	793	1356.65	514729686	140454323	7911	256
	Note: 1. All experiments were conducted on a personal computer with the following specifications: 32GB 2400 MHz DDR4 memory, Intel Core i7-11700 2.5 GHz 8 cores processor. 2. Filter details: Genotype-level filtering excluded genotypes with low depth (say DP < 8) and quality score (say GQ < 20), while locus-level filtering excluded SVs violating Hardy-Weinberg equilibrium (say p-value<10-6).
	Availability of Data: The whole genome SVs from UK Biobank was accessed through a collaboration with application ID 86920. Structural Variants (SV) data in VCF.GZ format were accessed under Field ID 23353.

## Sheet: Table S6
	Table S6:	The number of merged SVs in each subset of the two trios
	Trio		Tool	All three	HG003/HG004	HG003 only	HG004 only	HG002/HG003	HG002/HG004	HG002 only	Totally	Mendelian discordance
	HG002 trio		SDFA	28178	4180	11322	11614	10603	10224	6511	82632	0.0787951
			Jasmine	26844	5043	18784	18687	13703	12836	13703	109600	0.125027
	Trio		Tool	All three	LELC7/LELC8	LELC7 only	LELC8 only	LELC5/LELC7	LELC5/LELC8	LELC5 only	Totally	Mendelian discordance
	LELC trio		SDFA	15226	3773	6591	3140	3803	1229	3652	37414	0.0976105
			Jasmine	14364	1344	5790	5157	4280	4322	8578	43835	0.195688
	Availability of Data: 1. The HG002 trio dataset comprises data for the son HG002 and his parents HG003/HG004. This dataset is derived from research related to the Jasmine tool and can be accessed at http://data.schatz-lab.org/jasmine. 2. The LELC trio dataset includes information for the daughter LELC5 and her parents LELC7/LELC8. It originates from the Chinese Quartet Genomics Project and is ava…
