# Supplementary material for: SDFA: A Standardized Decomposition Format and Toolkit for Efficient Analysis of Structural Variants in Large-scale Population Genomic Studies
Source: Research Square preprint supplement (doi:10.21203/rs.3.rs-5058112/v1), 2025-05-27
Supplement: Supplementary file 2 [file 371944a262f4a03b8cd1a15c.docx]

### Supplementary Figure 1.


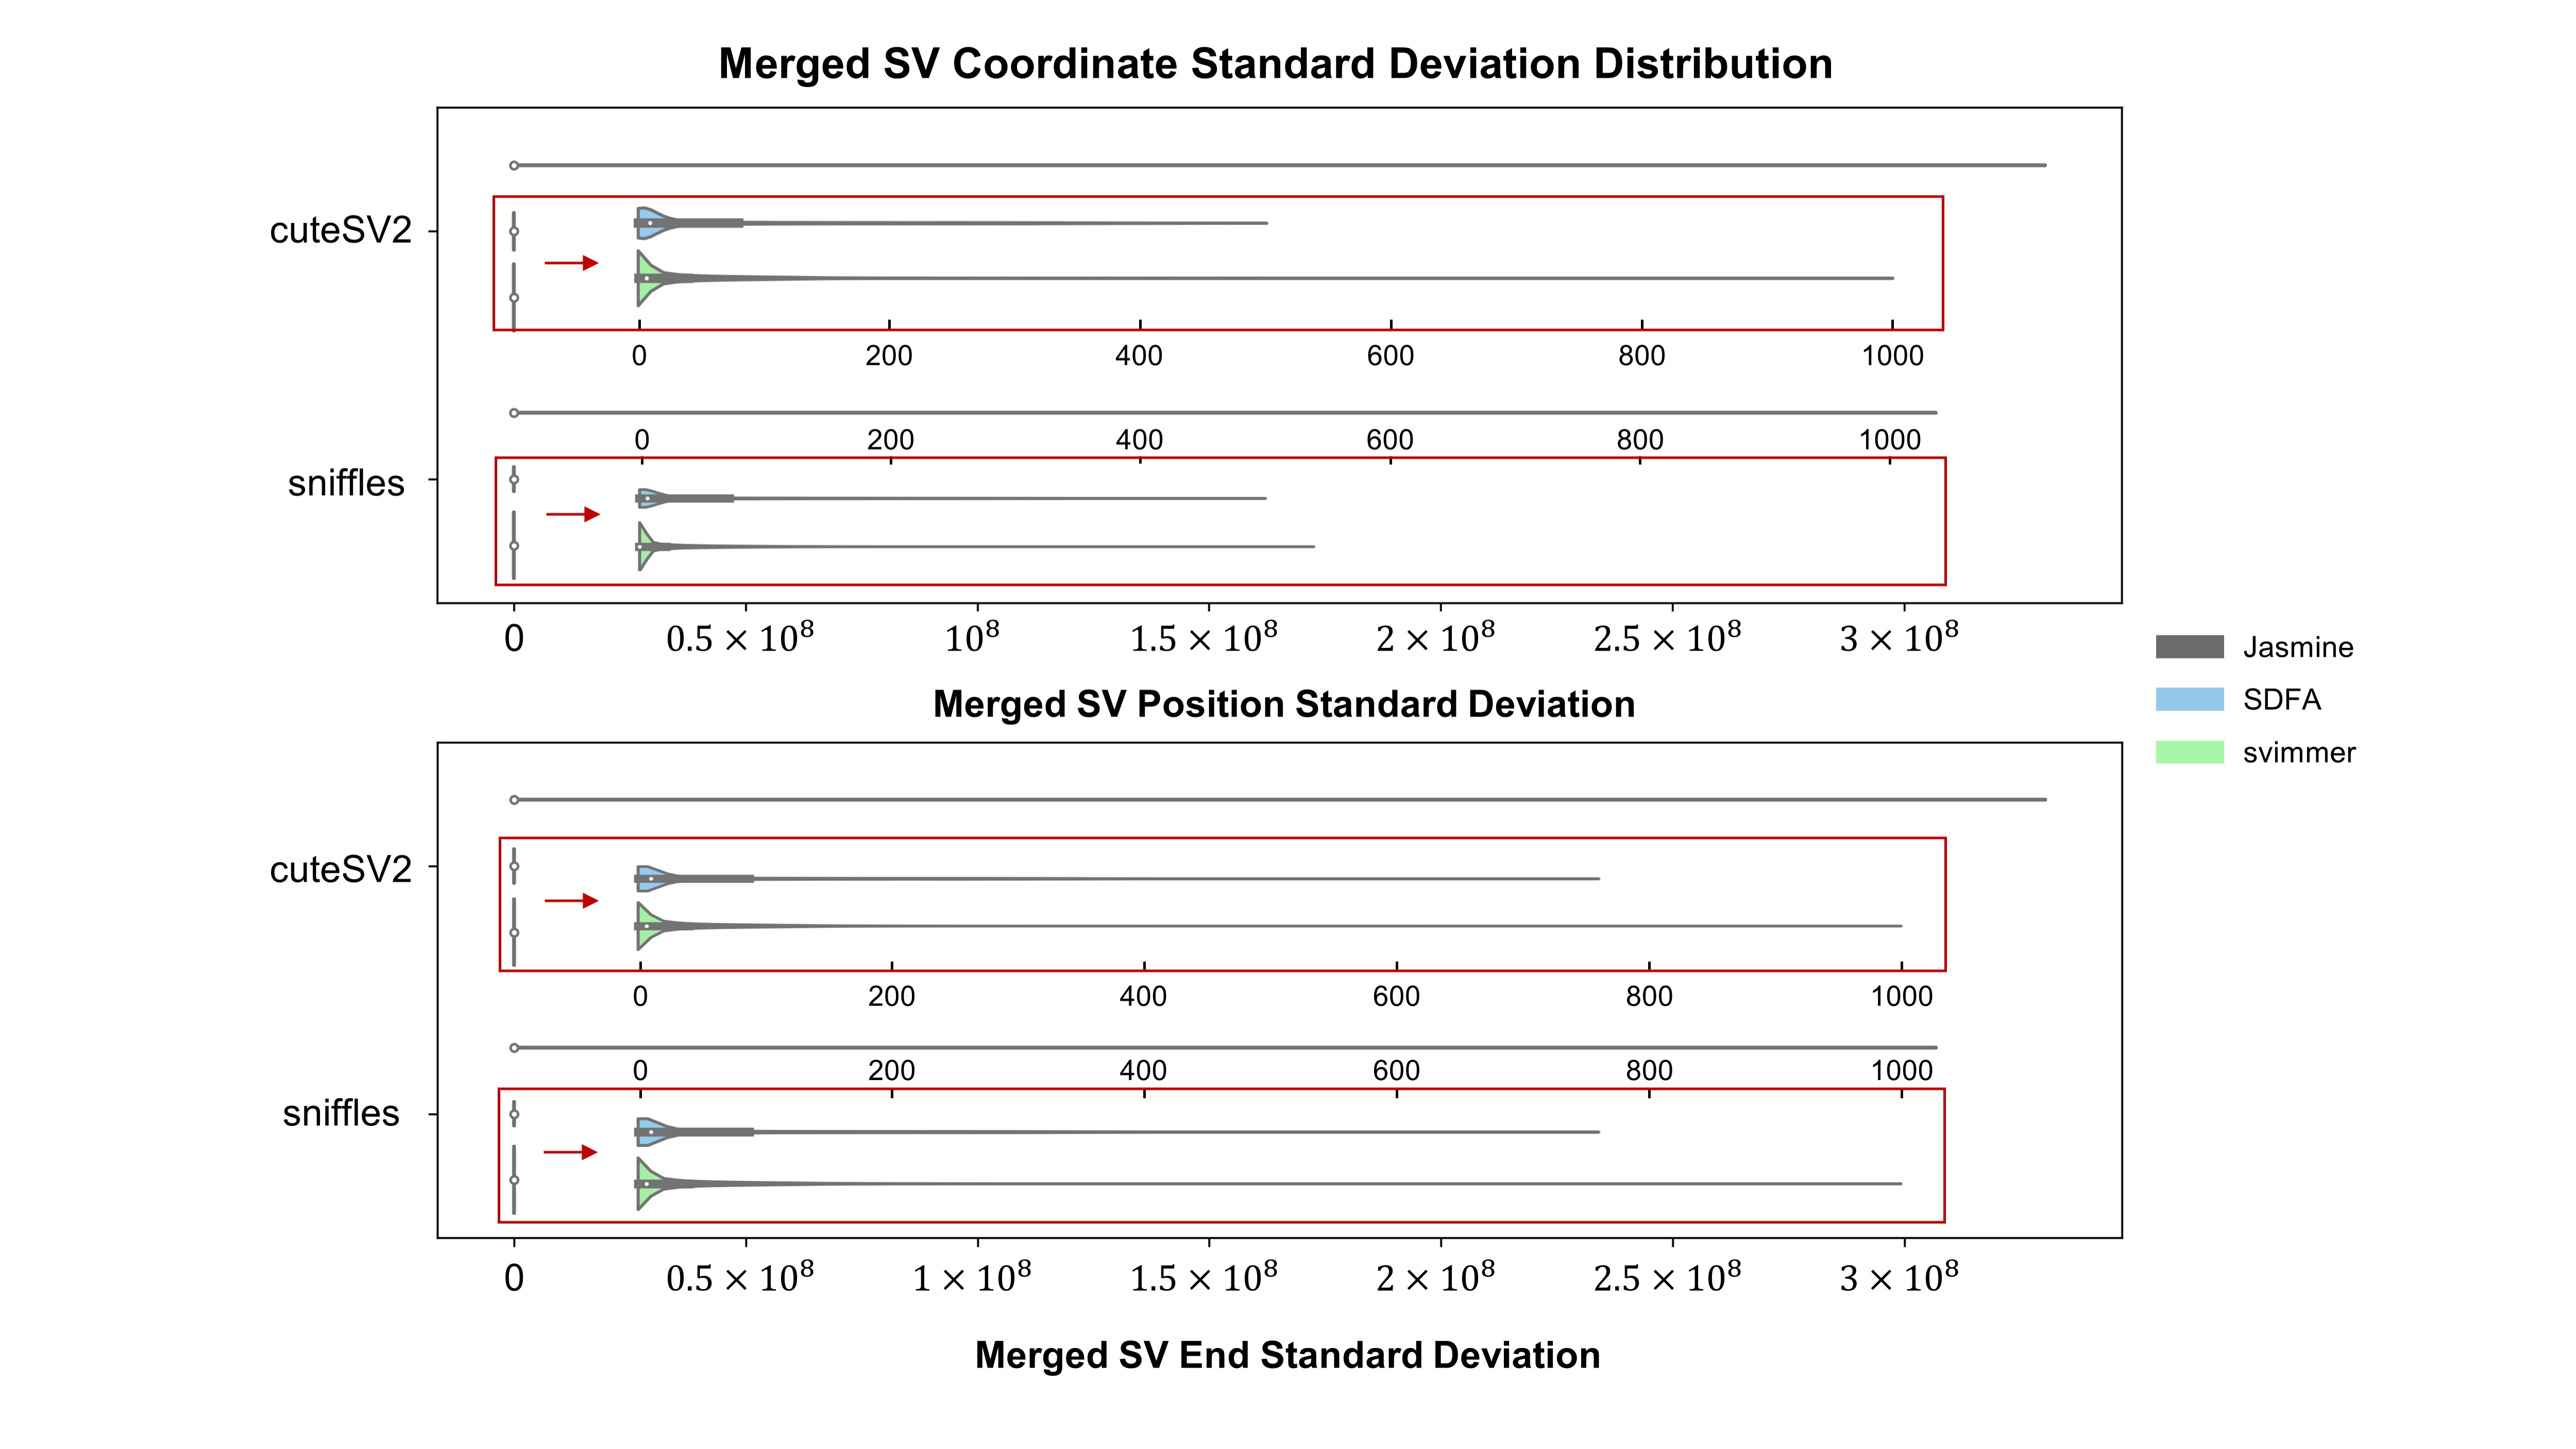


**Fig. S1 |** **Distribution of standard deviation ranges for coordinates in merged SVs across Jasmine, SDFA, and svimmer.**

### Supplementary Figure 2.


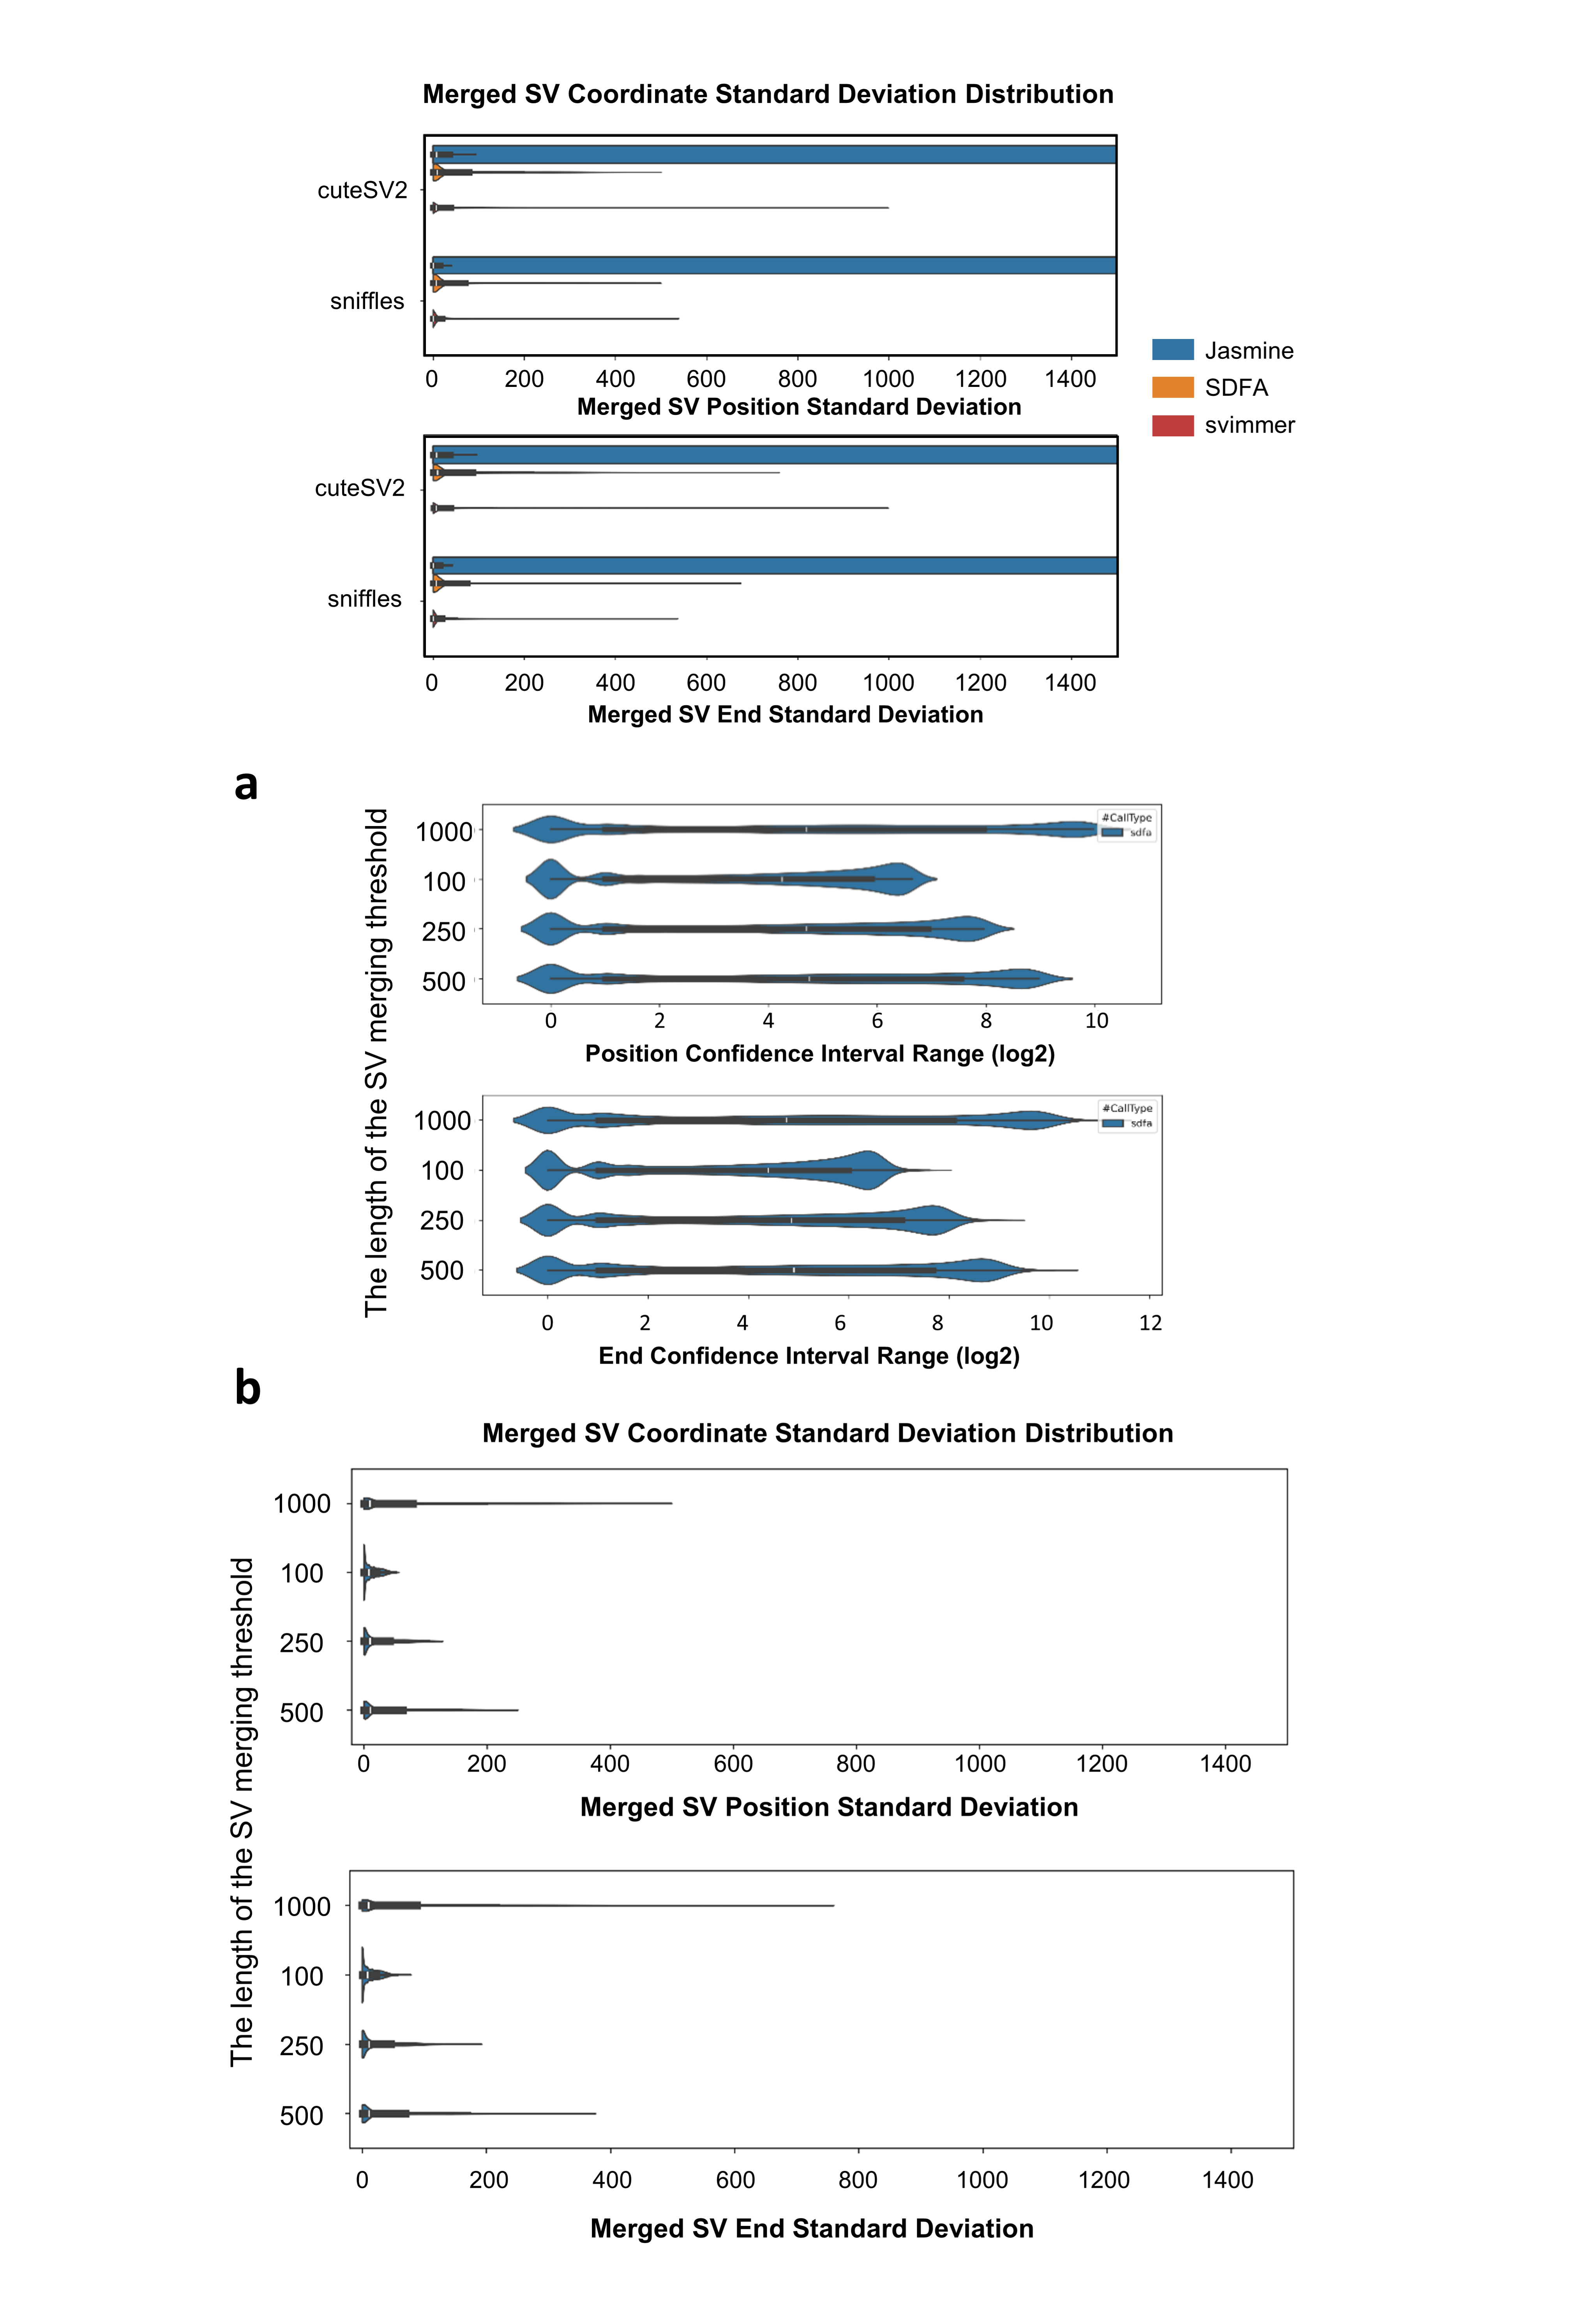


**Fig. S2 | Coordinate range distributions in merged SVs using merging thresholds of 100bp, 250bp, 500bp, and 1000bp.** a) Distributions of bias ranges for start position and end position. b) Distributions of standard deviation ranges for start position and end position.

### Supplementary Figure 3.


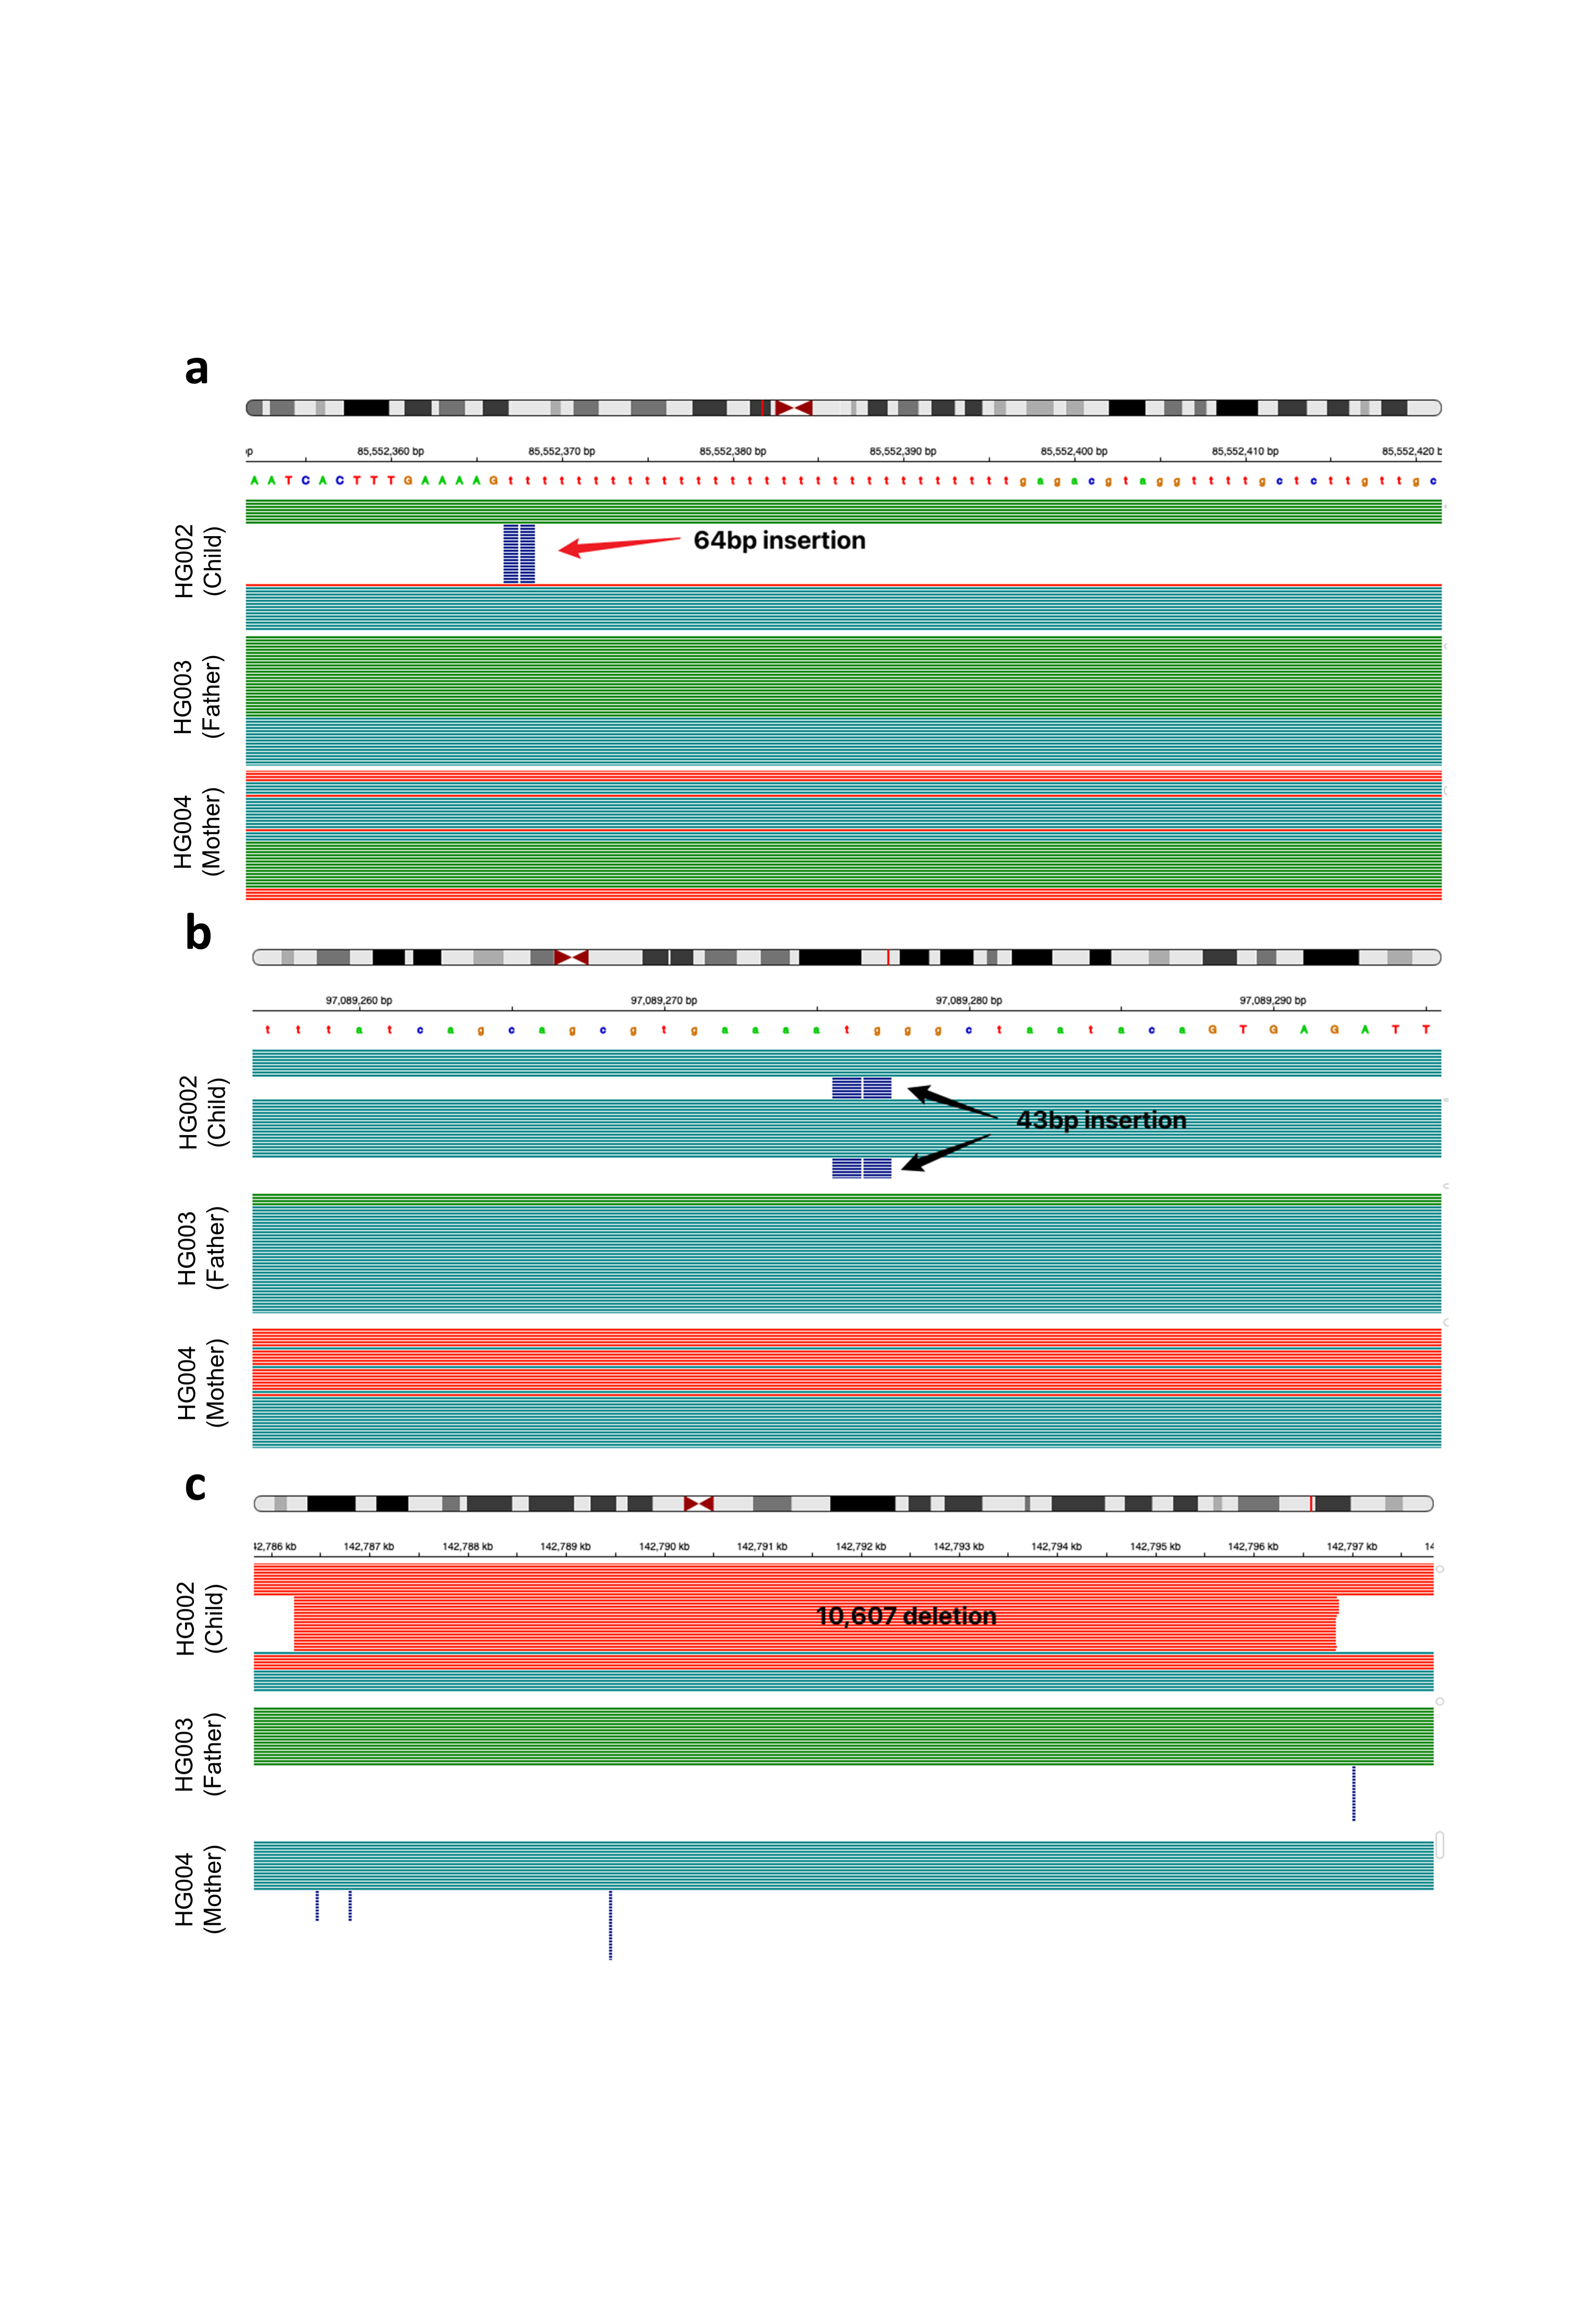


**Fig. S3 | Three potential de novo SVs in the HG002 subject.**

a) A 64bp insertion at chr3:85552367. This variant is supported as present in HG002 by HiFi and CLR reads but was missed by ONT-based calls, likely due to the adjacent homopolymer.

b) A 43bp insertion at chr5:97089276, supported by all three technologies: HiFi, CLR, and ONT-based reads.

c) A 10,607bp deletion at chr7:142786222, in the highly variable T cell Receptor Beta (TRB) region. This SV is supported by all three technologies as present in HG002.

### Supplementary Figure 4.


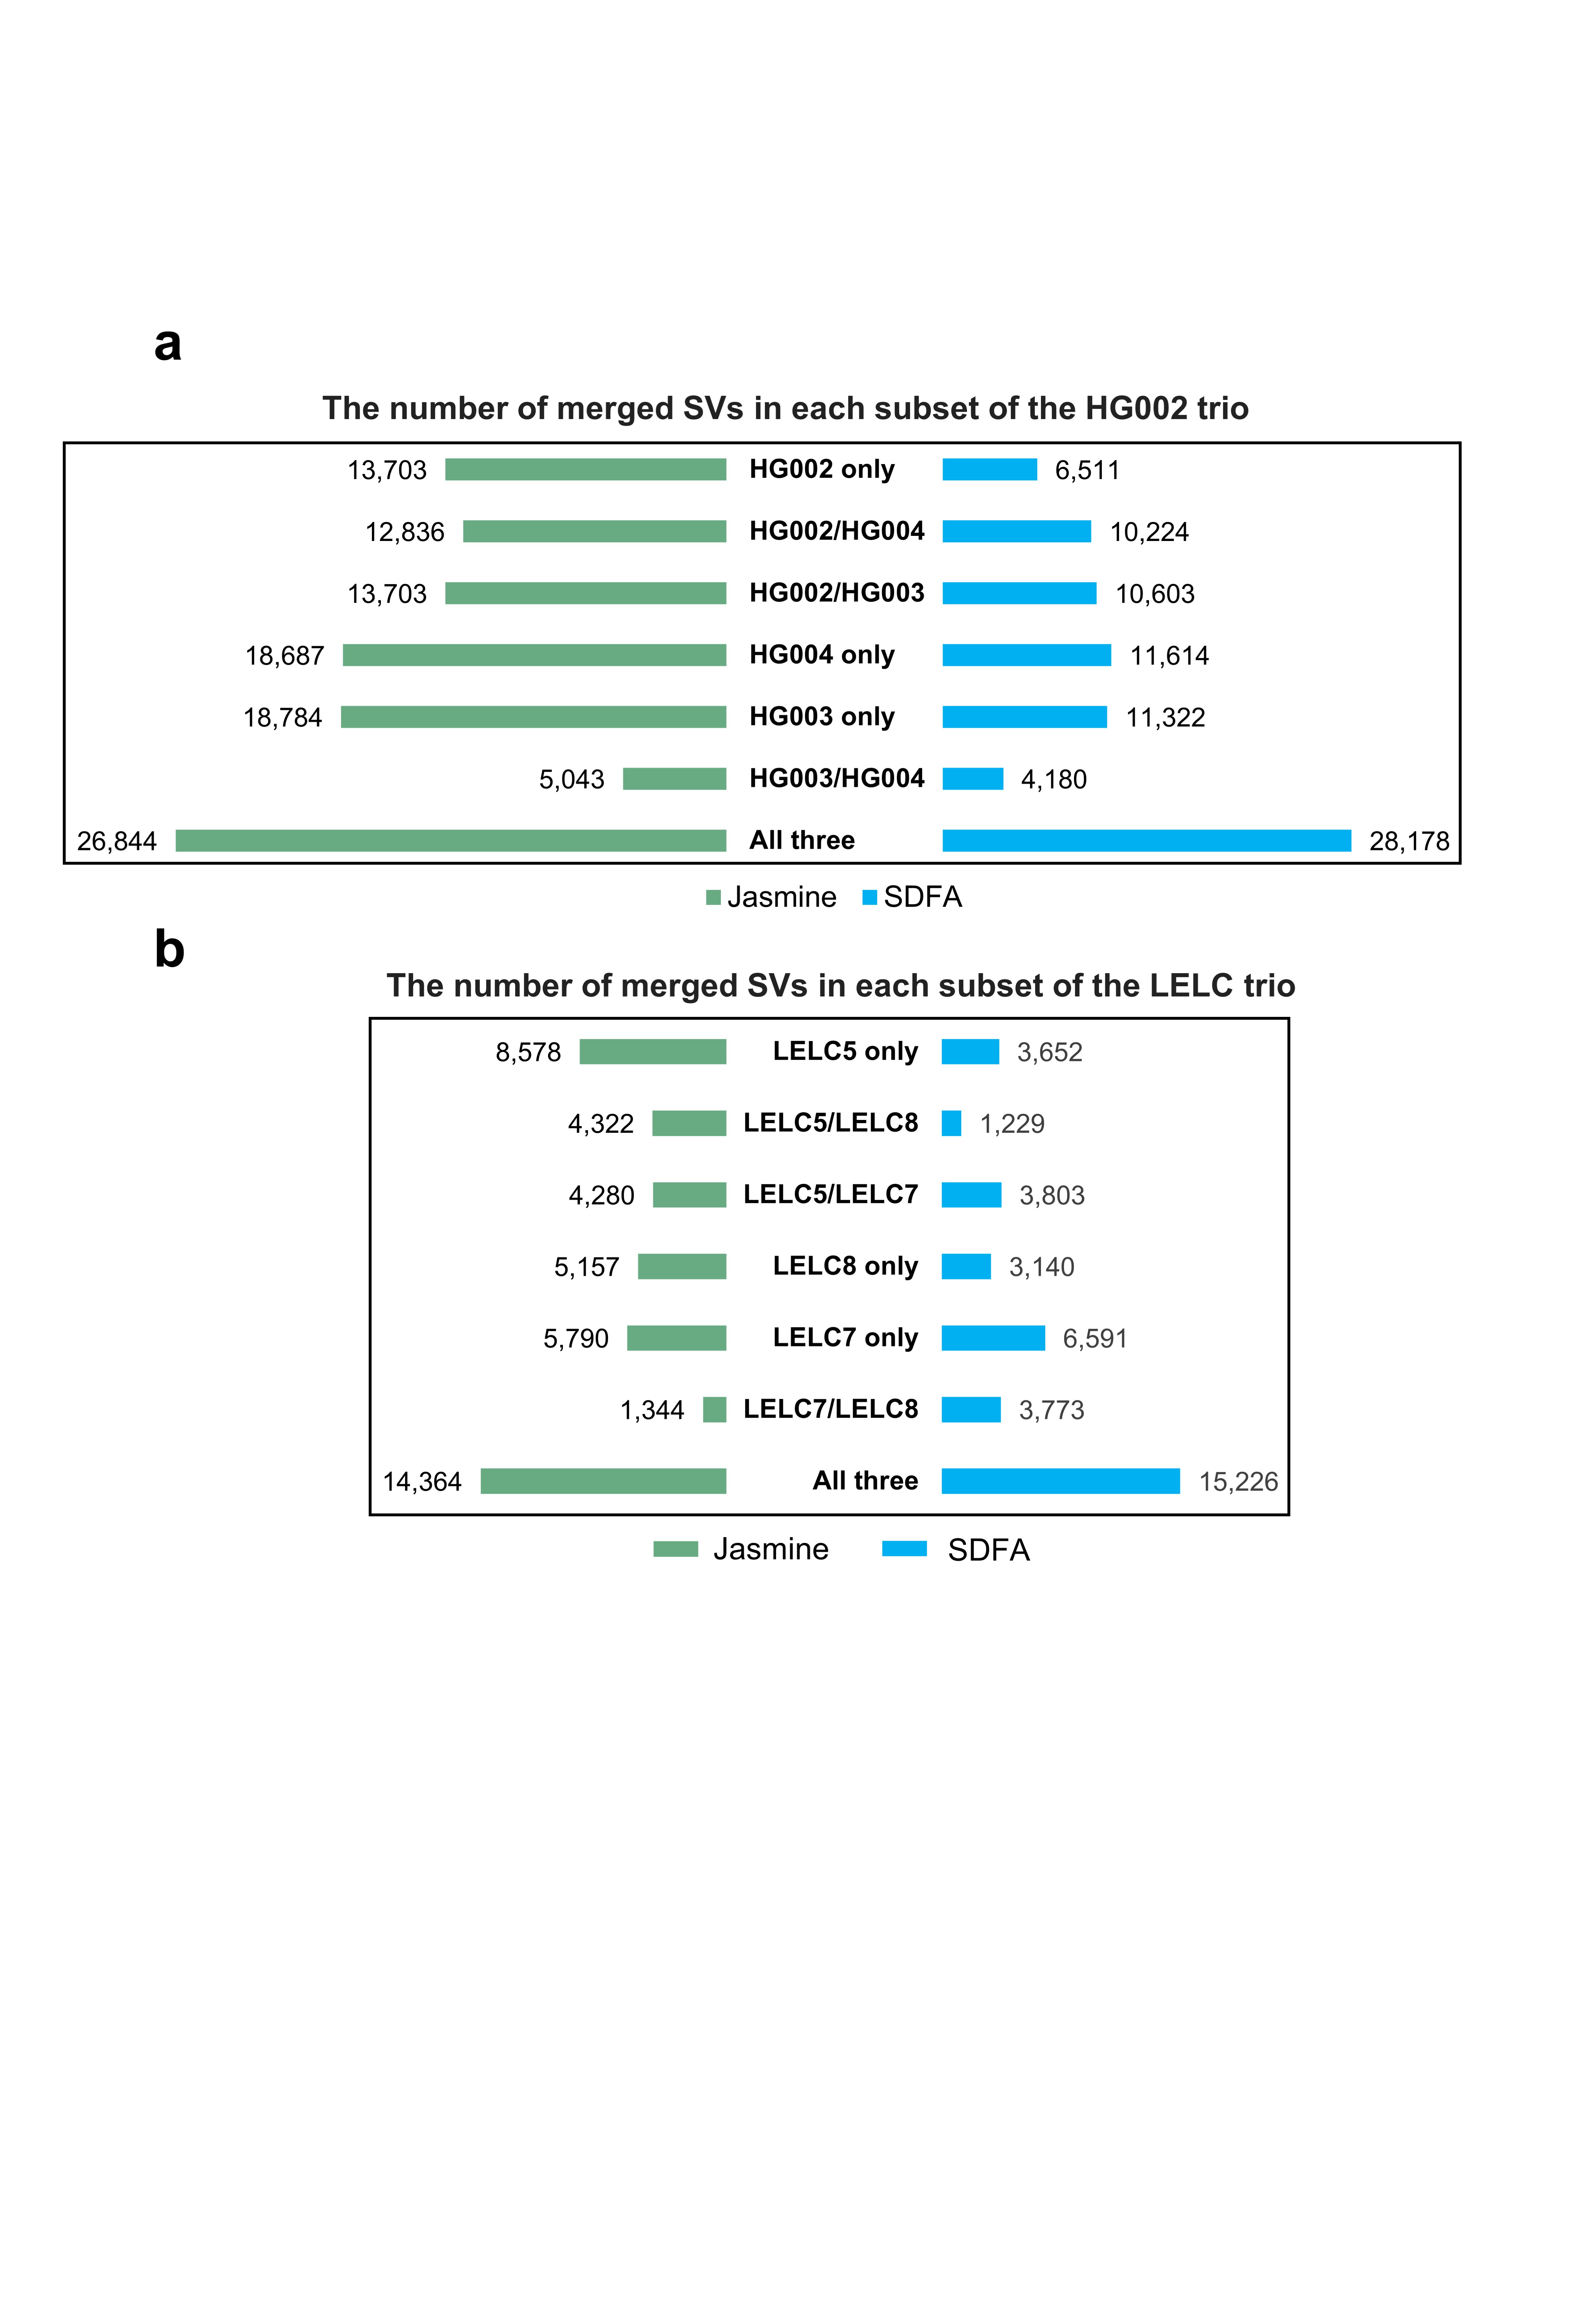


**Fig. S4 | The number of merged SVs in each subset of the HG002 and LELC trio. Compared to Jasmine, SDFA demonstrated a lower discordance rate, achieving 0.079 versus 0.125 in the HG002 subset and 0.098 versus 0.196 in the LELC trio subset.**

### Supplementary Figure 5.


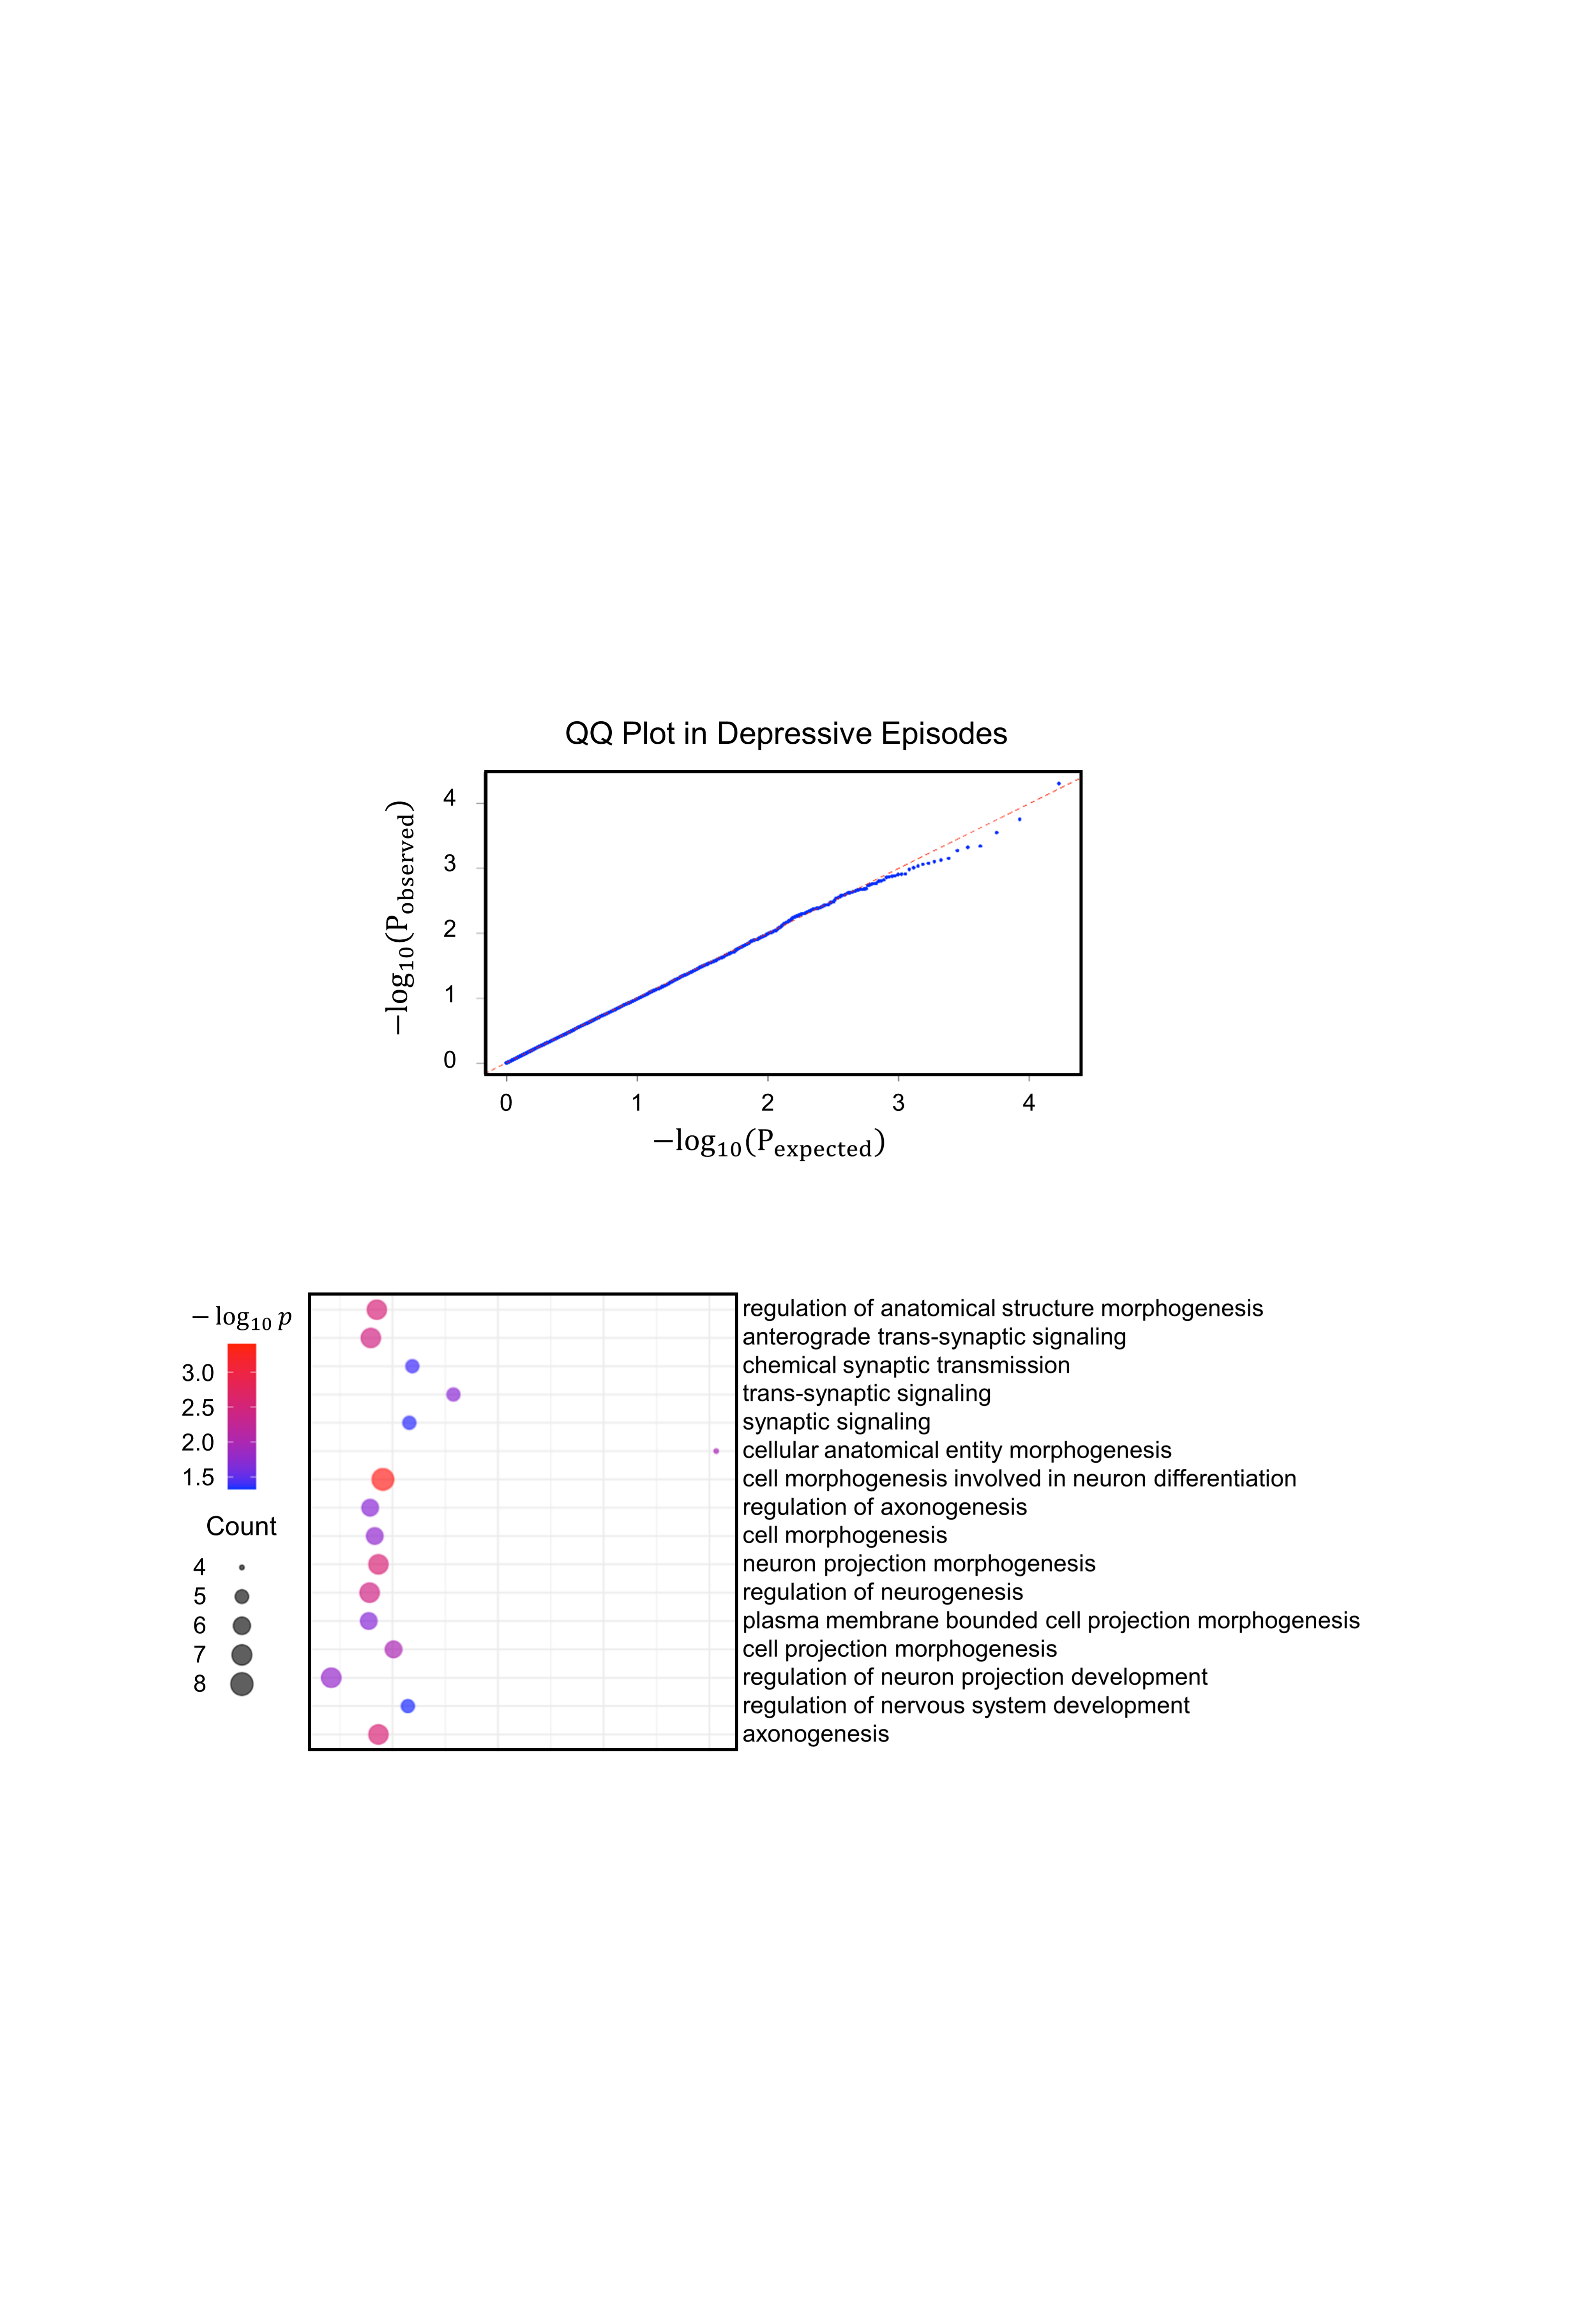


**Fig. S5 | Quantile-quantile plot for 304,376 SVs in depressive episodes from the UK Biobank.**

### Supplementary Figure 6.


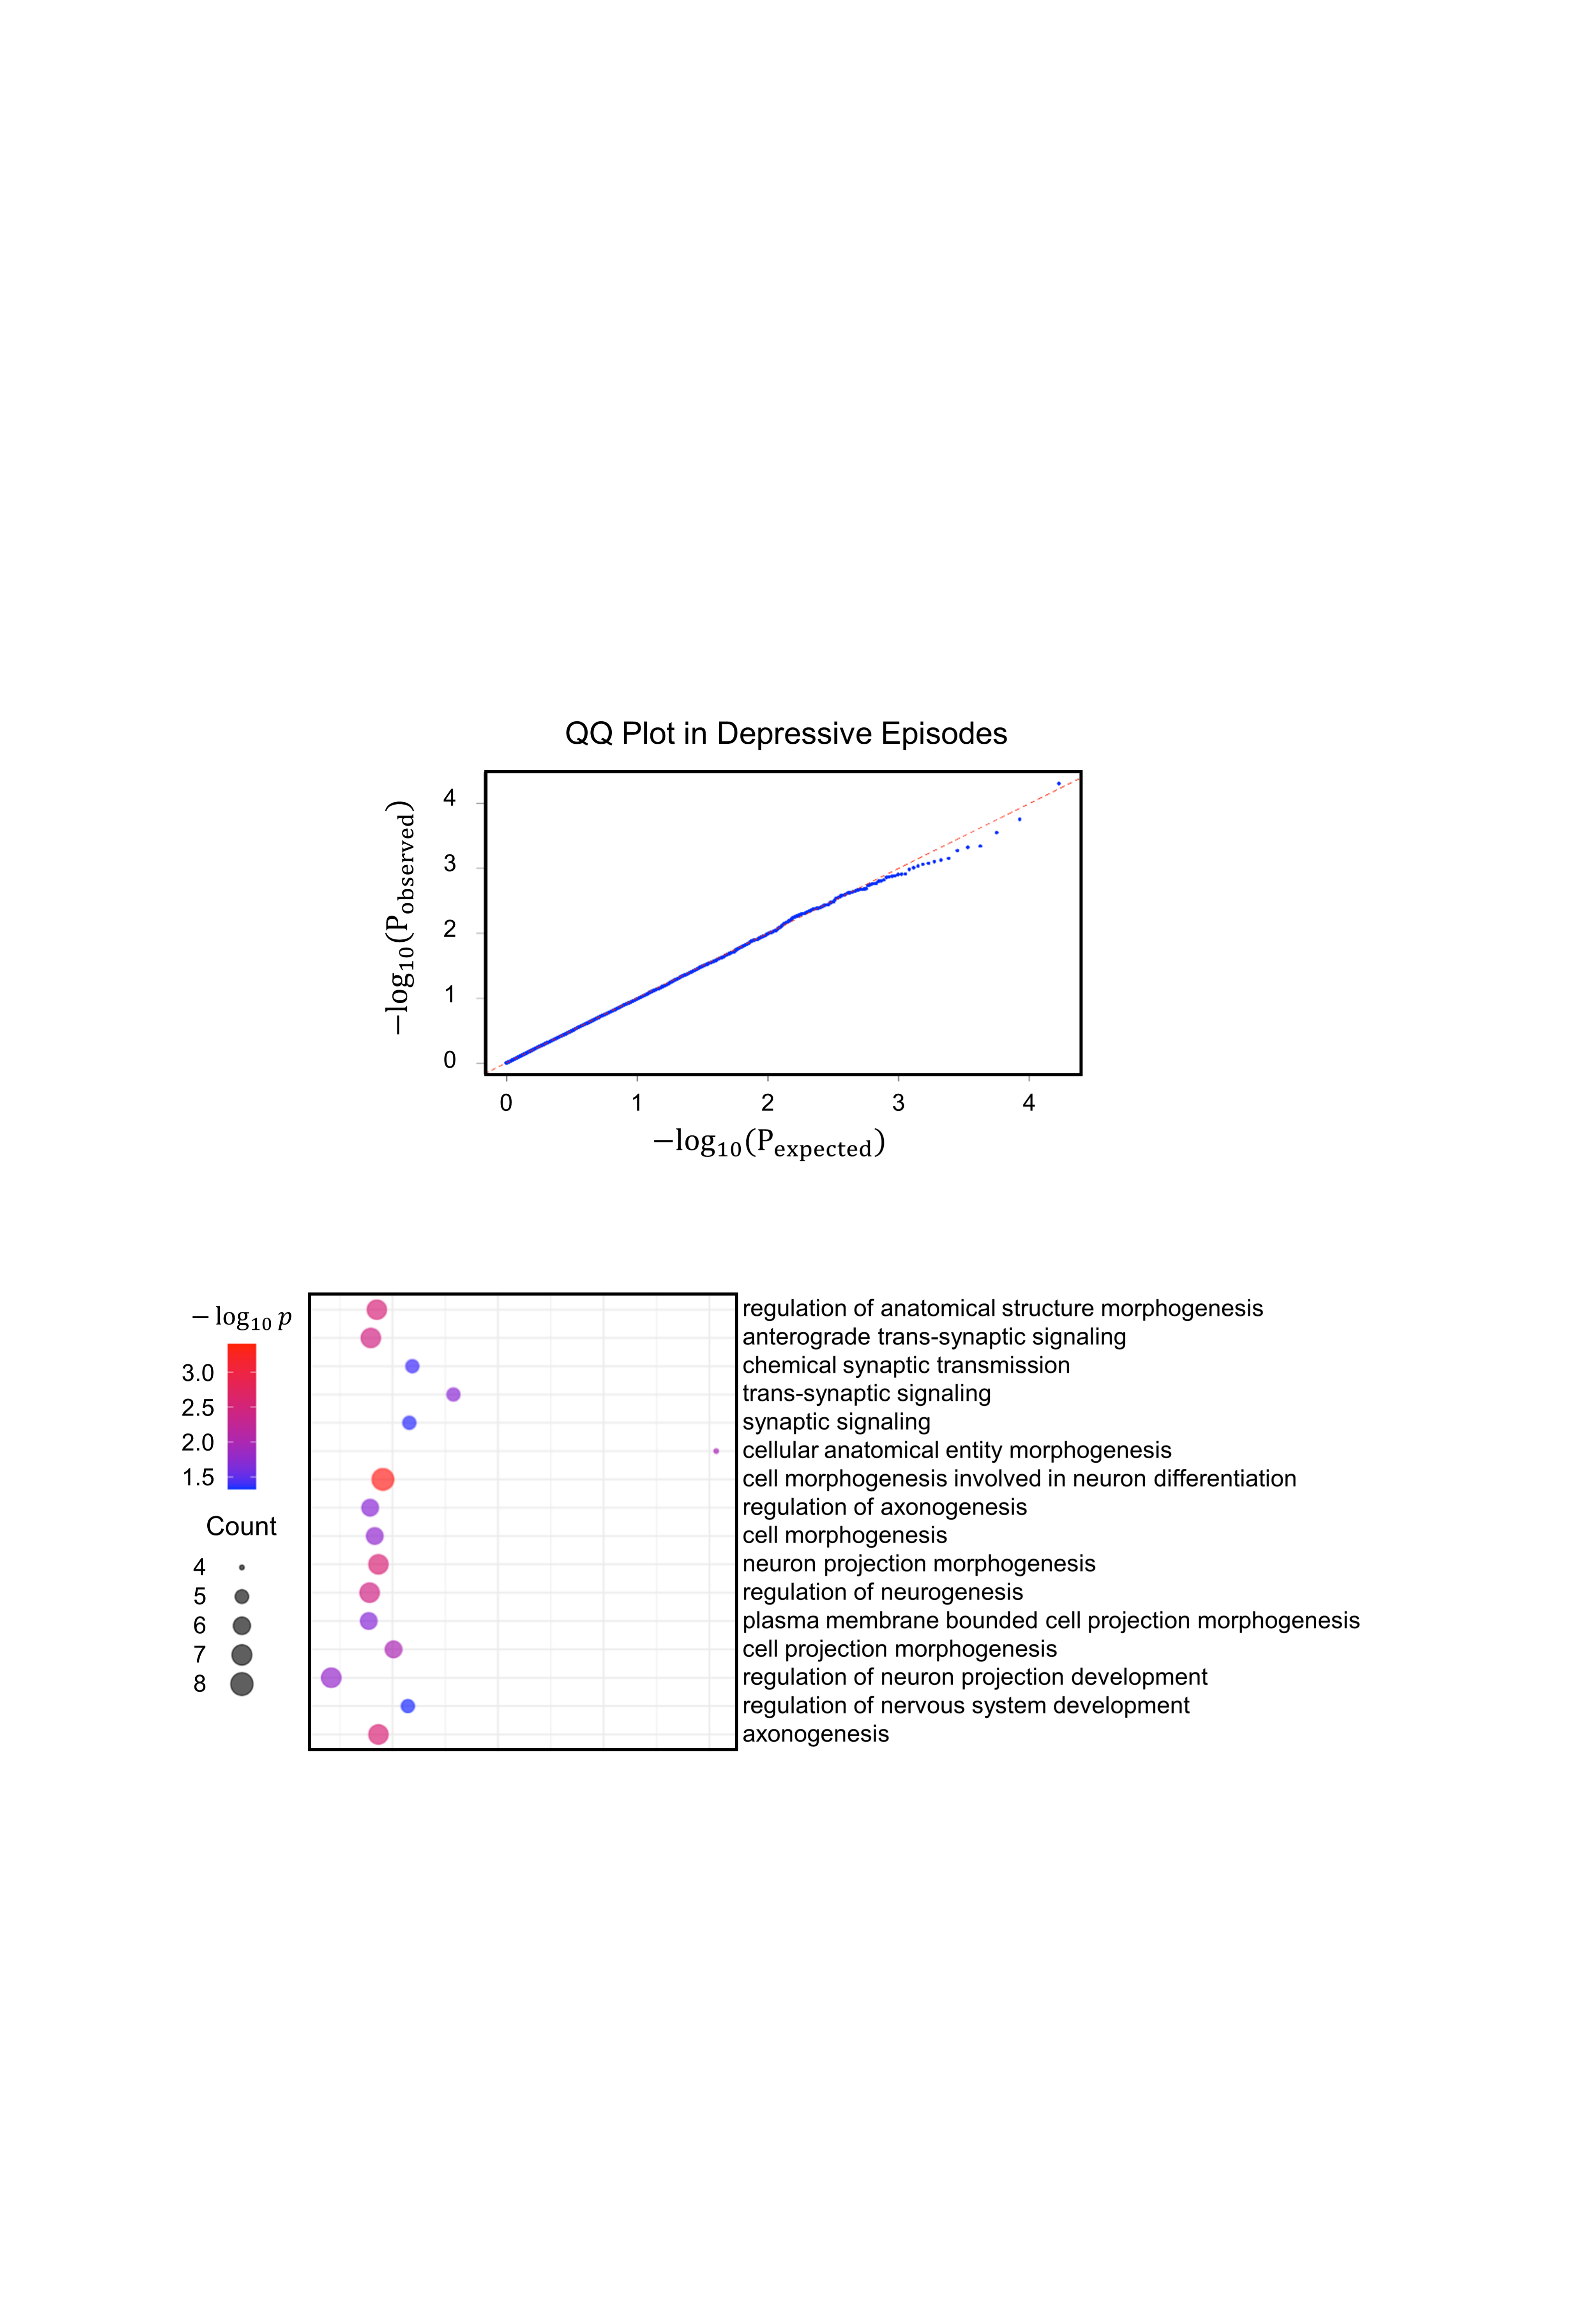


**Fig. S6 | Biological process enrichment results for the 50 genes affected by SVs, showing the top 120 p-values.**

### Supplementary Figure 7.


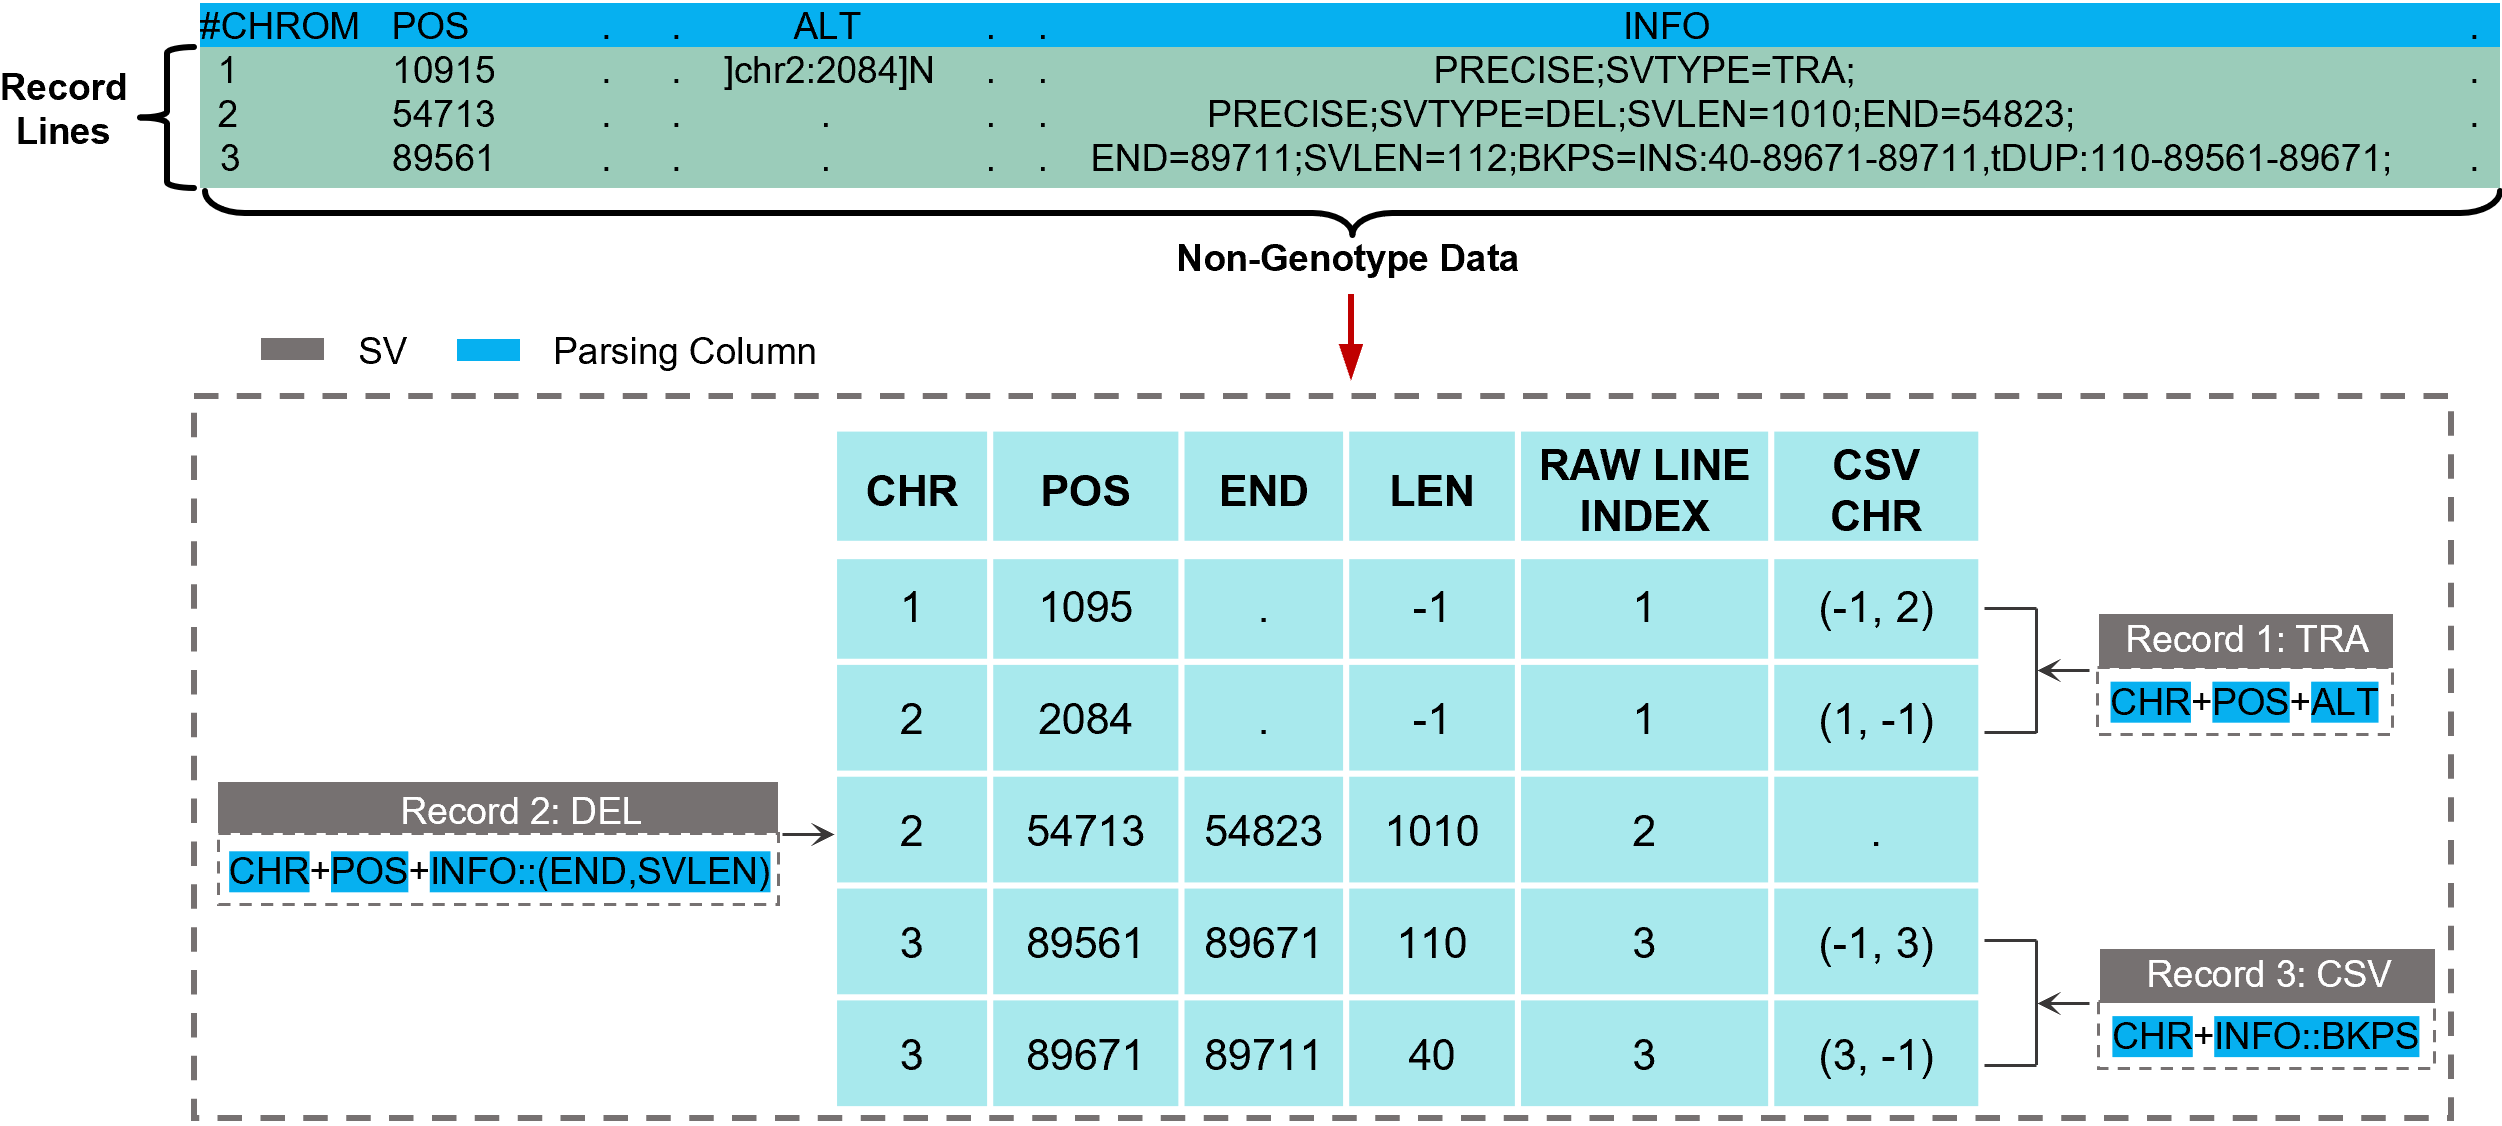


**Figure. S7 | Schematic Illustration of Determining Start and End Points for Different Types of Structural Variants (SVs) Extracted from VCF Files.**

### Supplementary Figure 8.


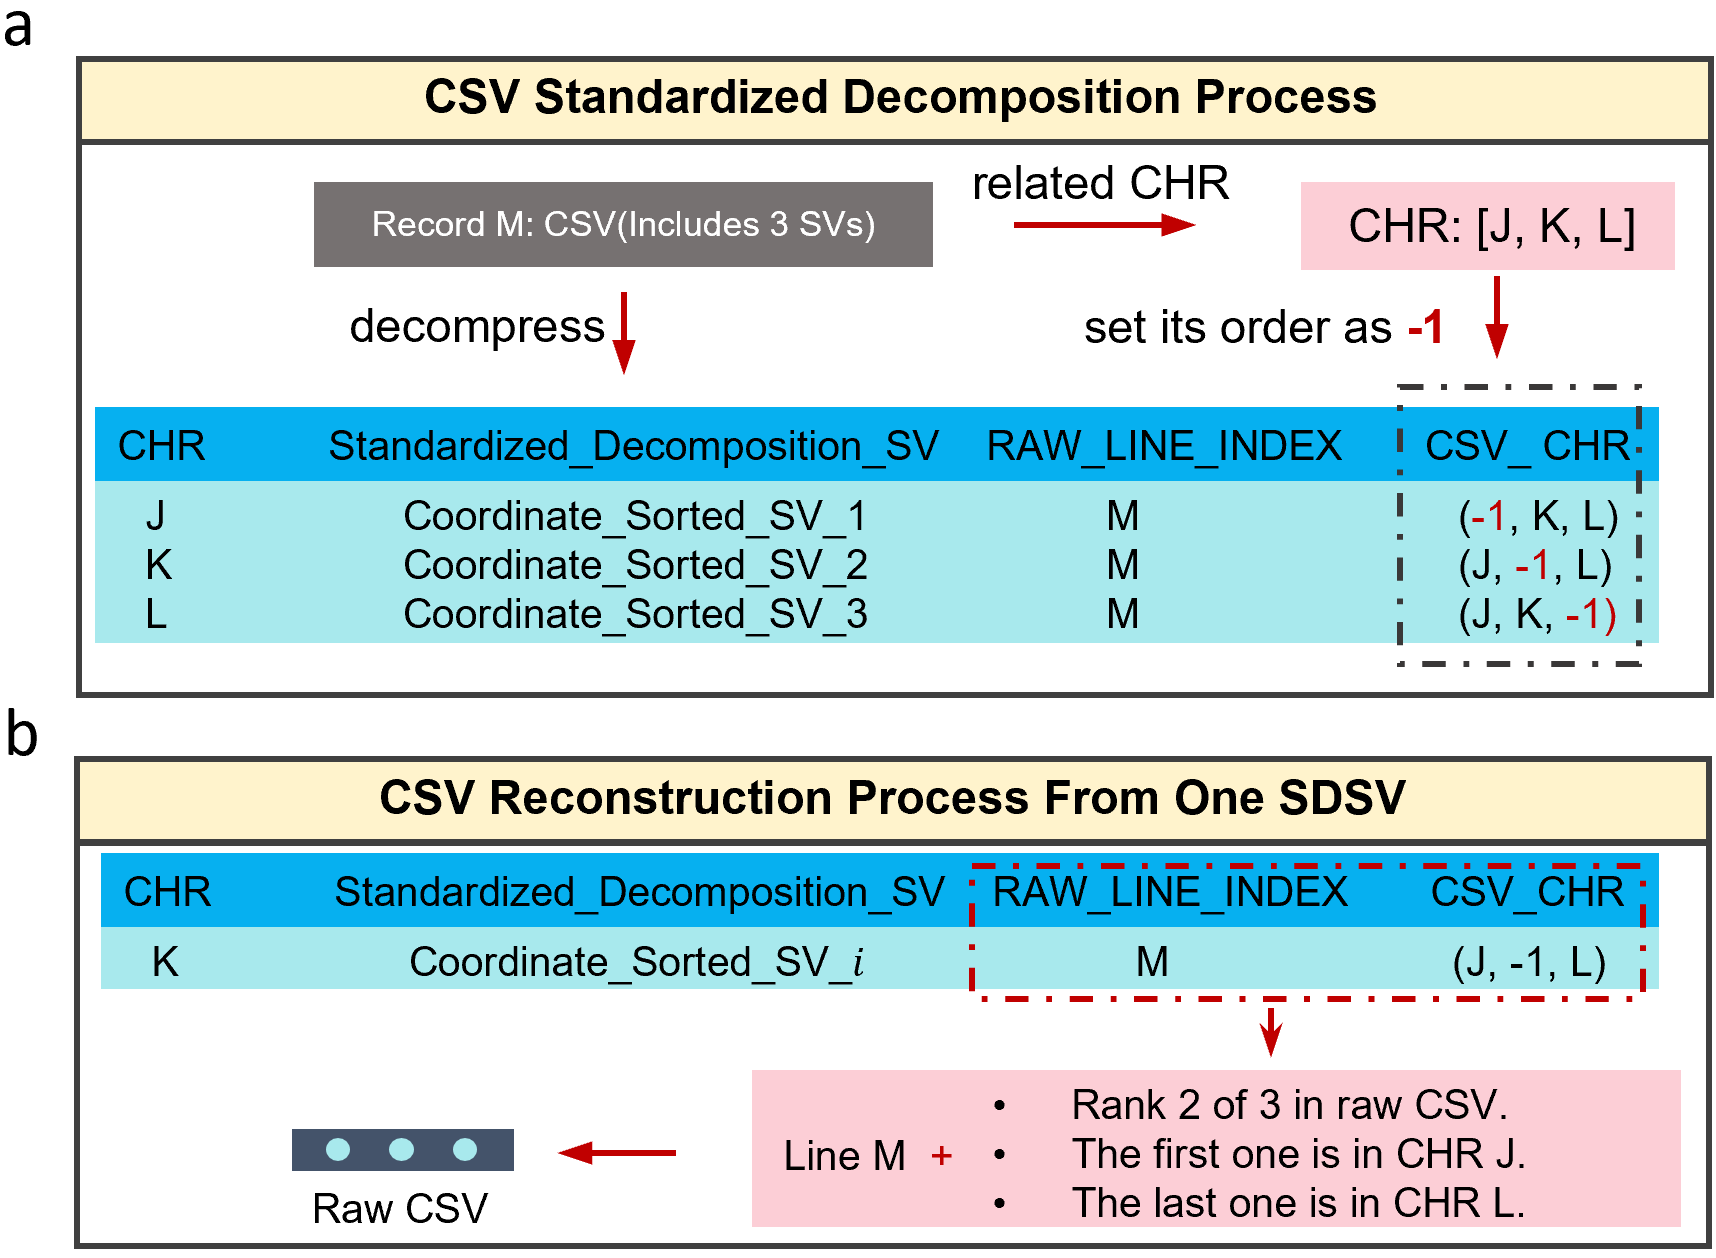


**Figure. S8 | Decomposition and Reconstruction of Complex SVs in SDF.**
