# Supplementary material for: SDFA: A Standardized Decomposition Format and Toolkit for Efficient Analysis of Structural Variants in Large-scale Population Genomic Studies
Source: Research Square preprint supplement (doi:10.21203/rs.3.rs-5058112/v1), 2025-05-27
Supplement: Supplementary file 3 [file 64e7649abb816d6f5f902b8a.docx]

**Supplementary Notes**

| **SDFA: A Standardized Decomposition Format and Toolkit for Efficient Analysis of Structural Variants in Large-scale Population Genomic Studies** |
| --- |

### Supplementary Note 1. 1100 VCF files of SV for extraction benchmark datasets

We initially collected 10 NCBI individuals: HG002 family pedigree data1 (HG002 [son], HG003 [father], HG004 [mother]), the HG005 family pedigree data1 (HG005 [son], HG006 [father], HG007 [mother]), the NA12878 subject2–5, the HG00096 subject6, the HG00512 subject6 and the CHM13 subject7. Then we used PacBio (CLR: Continuous Long Read, CCS: Circular Consensus Sequencing) and Nanopore (ONT) platforms, 5 aligners and 10 callers to construct the pipelines, with all parameters set to default values. After that, except for 6 invalid pipelines(pbmm2-Nanovar, lra-Picky, lra-delly, lra-NanoVar, lra-NanoSV, lra-pbsv), we obtain 1100 VCF files.

**Sequence Platform:**

**Table 1. Sequencing platforms for 10 NCBI samples**

| Name | Platform |
| --- | --- |
| HG002 | ONT, CLR, and CCS |
| HG003 | ONT, CLR, and CCS |
| HG004 | ONT, CLR, and CCS |
| HG005 | CLR, and CCS |
| HG006  HG007  NA12878  HG00096  HG00512  CHM13 | CLR, and CCS  CLR, and CCS  ONT and CCS  ONT and CCS  ONT, CLR, and CCS  ONT, CLR, and CCS |

**Aligners:**

**Table 2. Alignment tools and versions**

| Name | Time | Version |
| --- | --- | --- |
| Lra8 | 2021 | 1.3.7.1 |
| minimap29,10 | 2018 | 2.17-r941 |
| ngmlr11 | 2018 | 0.2.7 |
| pbmm2  (https://github.com/PacificBiosciences/pbmm2) | 2018 | 1.3.0 |
| winnowmap12,13 | 2020 | 1.11 |

**Callers:**

**Table 3. SV calling tools and versions**

| Name | Time | Version |
| --- | --- | --- |
| cuteSV214 | 2022 | 2.0.3 |
| DeBreak15 | 2022 | 1.0.2 |
| DELLY16 | 2012 | 0.8.1 |
| NanoVar17 | 2020 | 1.3.2 |
| NanoSV18 | 2017 | 1.2.4 |
| pbsv  (https://github.com/PacificBiosciences/pbsv) | 2017 | 2.3.0 |
| Picky19 | 2018 | 0.2.a |
| Sniffles220 | 2022 | 2.2 |
| SVIM21 | 2019 | 1.4.2 |
| Svision22 | 2022 | 1.3.8 |

Above all, after excluding the invalid pipelines, 44 pipelines(5*10-6) are used to generate VCF files across aligners and callers. Considering the total 25 sequence platform results from the above 10 subjects, there are 1100 VCF files(44*25=1100). The complete pipeline commands are available (<https://github.com/liuz-bio/SVPipelinesEvaluation/tree/main/BuildPipelines/Rule>). Using the configuration files in this directory with Python scripts, we executed all pipeline combinations to generate these 1,100 VCF files, which are archived at: https://zenodo.org/records/13293672 (DOI: 10.5281/zenodo.13293672).

### Supplementary Note 2. Four built-in modes for the SDF file

Based on the structure of SDF, SDFA initializes four modes for SDF files for smaller storage:

**Mode 0:** This mode, an initial mode for SDF, compresses values in each attribute into String type. Besides, each standardized SV decomposed from a complex SV stores one copy for the shared attributes.

**Mode 1:** This mode employs a built-in encoding method for REF and ALT sequences of the Field attribute in the columnar block body. SDFA initially uses 2 bits in an integer value to encode nucleotide bases in two fields: A (00), T (01), C (10), and G (11). The raw value is stored in the SDF file if the field is not a base sequence.

**Mode 2:** This mode stores only one copy for the INFO fields of the Field attribute for each complex SV. In this mode, SDF only stores the INFO values in the first standardized decomposition SV of each complex SV, leaving the others empty.

**Mode 3:** This mode discards the quality metrics (e.g., AD, DP) of genotypes. This mode is suitable for SDF files that have been filtered through the genotype, providing a streamlined version with only essential information retained.

The SDF files of the first three modes (Mode 0, 1 and 2) are lossless compressions of raw VCF files, ensuring no loss of critical information during compression. Mode 3, while lossy, is optimized for cases where specific annotation details are no longer required.

### Supplementary Note 3. The 46 VCF files of SV for the merging process

In the merging tests, we include 46 HIFI subjects from HPRC6 as below.

1. HG00438; 2. HG00621; 3. HG00673; 4. HG00735;

5. HG00741; 6. HG01071; 7. HG01106; 8. HG01123;

9. HG01175; 10. HG01258; 11. HG01358; 12. HG01891;

13. HG01928; 14. HG01952; 15. HG01978; 16. HG02148;

17. HG02257; 18. HG02486; 19. HG02559; 20. HG02572;

21. HG02622; 22. HG02630; 23. HG02717; 24. HG02886;

25. HG03453; 26. HG03516; 27. HG03540; 28. HG03579;

29. HG002; 30. HG005; 31. HG00733; 32. HG01109;

33. HG01243; 34. HG02055; 35. HG02080; 36. HG02109;

37. HG02145; 38. HG02723; 39. HG02818; 40. HG03098;

41. HG03486; 42. HG03492; 43. NA18906; 44. NA19240;

45. NA20129; 46. NA21309.

Sequencing data for 1-28 of the above samples can be downloaded at [https://s3-us-west-2.amazonaws.com/human-pangenomics/index.html?prefix=working/HPRC](https://s3-us-west-2.amazonaws.com/human-pangenomics/index.html?prefix=working/HPRC/). The index of the above samples from 29 to 46 can be downloaded at <https://s3-us-west-2.amazonaws.com/human-pangenomics/index.html?prefix=working/HPRC_PLUS>. After collecting the bam files of the above samples, we called the SVs from these files separately using CuteSV2 and Sniffles.

### Supplementary Note 4. The Mann-Whitney U tests on merged SV length between SDFA and other tools.

Table 1. Mann-Whitney U tests on SV length between SDFA and other tools.

| Comparison | Adjusted P-Value |
| --- | --- |
| SDFA vs jasmine |  |
| SDFA vs svimmer |  |
| SDFA vs Truvari |  |

The adjusted *p*-values confirm statistically significant shorter SV lengths for SDFA (all ). This aligns with SDFA’s sample-wide algorithm, which reduces fragmentation by consistently merging overlapping SVs under fixed criteria (start/end differences ≤1,000 bp). SURVIVOR’s median lengths were comparable but excluded from comparisons due to input-order dependency as discussed in Line 221.

### Supplementary Note 5. Annotation Resources for SDFA

SDFA supports the integration of external databases for SV annotation, provided that the external data files adhere to the following basic format requirements:

1. The annotation file must use a tab character (\t) as a delimiter.
2. The annotation file must include a header line with column names, beginning with a number sign (#). Lines that begin with double number signs (##) will be ignored.

Additionally, for SDFA to process interval annotation files and reference SV annotation files, these files must also meet the following specific criteria:

**Interval File:** The first three columns in the interval annotation file must meet the following requirements.

**Table 4. Interval annotation file format**

| Column | Name | Type | Example |
| --- | --- | --- | --- |
| 1 | Chromosome | String | Chr1 |
| 2 | Start Position | Integer | 1000 |
| 3 | End Position | Integer | 3000 |
| 4 | [Feature 1] | String[Optional] | Feature_1 |
| …  N | …  [Feature N] | …  String[Optional] | …  Future_N |

**Reference SV File:** The first five columns in the known SV annotation file must meet the following requirements.

**Table 5. Known SV annotation file format**

| Column | Name | Type | Example |
| --- | --- | --- | --- |
| 1 | Chromosome | String | Chr1 |
| 2 | Start Position | Integer | 1000 |
| 3 | End Position | Integer | 3000 |
| 4 | SV Length | Integer | 2000 |
| 5  6  …  N | SV Type  [Feature 1]  …  [Feature N] | Integer  String[Optional]  …  String[Optional] | DEL  Future_1  …  Feature_N |

Meanwhile, SDFA comes preloaded with multiple annotation resources based on the GRCh38 genome assembly, including:

**Table 6. Annotation resources for benchmarking**

| Resource | Annotation Records | Source | Raw URL |
| --- | --- | --- | --- |
| CytoBand | 1,549 | . | <http://hgdownload.cse.ucsc.edu/goldenpath/hg38/database/cytoBand.txt.gz> |
| Reference Genome | 104,726 | RefGene | <http://hgdownload.cse.ucsc.edu/goldenPath/hg19/database/refGene.txt.gz> |
| 306,860 | GEncode | <https://www.gencodegenes.org> |
| 329732 | KnownGene | <http://hgdownload.cse.ucsc.edu/goldenPath/hg19/database/knownGene.txt.gz> |
| GeneHancer  v5.1423,24 | 393,464 | . | <https://www.genecards.org/Guide/DatasetRequest> |
| EnhanceAtlas25 | 163,859 | RefSeq | <https://github.com/lgmgeo/AnnotSV/blob/master/bin/INSTALL_annotations.sh> |
| 163,834 | ENSEMBL | <https://github.com/lgmgeo/AnnotSV/blob/master/bin/INSTALL_annotations.sh> |
| miRTargetLink26 | 2,756 | RefSeq | <https://github.com/lgmgeo/AnnotSV/blob/master/bin/INSTALL_annotations.sh> |
| 2,756 | ENSEMBL |
| SVAFotate27 | 1,310,802 | . | <https://github.com/fakedrtom/SVAFotate/blob/master/supporting_data/SVAFotate_core_SV_popAFs.GRCh38.bed.gz> |
| TAD24 | 17,918 | . | <https://github.com/lgmgeo/AnnotSV/blob/master/bin/INSTALL_annotations.sh> |

Note that SDFA utilizes four of the aforementioned databases for annotation-RefGene, Genehancer, SVAFotate, and TAD-comprising a total of 2,746,541 records. This comprehensive integration enables SDFA to provide more thorough and accurate structural variant annotations compared to AnnotSV.

License: The GeneHancer dataset was accessed through a collaboration with Ticket#983089.

### Supplementary Note 6. The gene feature annotation for SVs in HGVS and NAGF

Here, we use the HG01106 subject as a case study to present various gene feature annotations for several structural variants (SVs), formatted in both HGVS28 and NAGF.

**Table 7. Gene feature annotation examples (HGVS vs. NAGF)**

| SV_ID | SV  [Chr:Start-Len-End] | HGVS | NAGF |
| --- | --- | --- | --- |
| cuteSV.INS.6144 | chr16:30224705-126-30224705 | NPIPB12:NM_001355401.1:c.523_524ins126  NPIPB13:NM_001321892.1:c.1972_1973ins126 | NPIPB12:64:[7,0,0,0,0]  NPIPB13:64:[22,0,0,0,0] |
| cuteSV.DEL.5907 | chr17:41041247-137-41041384 | KRTAP1-1:NM_030967.3: c.67-204_14-151del  KRTAP9-7: NM_001277332.1:c.1-137_1-84del | KRTAP1-1:64:[15,0,0,0,0]  KRTAP9-7:76:[18,0,0,0,3] |

To further illustrate the NAGF, we take NPIPB12:64:[7,0,0,0,0] as an example. The NAGF value consists of two components:

1. A binary score (e.g., 64), encoded as an 8-bit integer, indicating impacted gene features (e.g., exon, promoter). For instance, 64 (binary 01000000) denotes a protein-coding exon impact.
2. Coverage percentages (e.g., [7,0,0,0,0]), quantifying the SV’s overlap with five regions (exon, promoter, UTR, intron, nearby). These percentages enable rapid prioritization of SVs affecting critical regions (e.g., exons with >5% coverage).

While the binary score requires computational parsing, the coverage percentages are human-interpretable and directly summarize SV impact across transcripts or genes.

Furthermore, while HGVS achieves base-level precision for small variants, its drawbacks for SVs include:

1. Complexity: HGVS demands SV-type-specific syntax. For instance, for inversions, the notation is c.301 - 143_oXYZ:233 + 17inv, and for translocations, it is c.523_524ins126. Additionally, different notations are used for 5' UTR (c.-) and 3' UTR (c.*). Decoding these requires specialized knowledge. (Examples can be found at https://www.hgvs.org/mutnomen/examplesDNA.html)
2. Lengthiness: When dealing with SVs that span multiple transcripts or genes, HGVS generates highly verbose annotations. For example, a deletion (chr1: 62686148-62686487) event from 1100 VCF files(CCS_CHM13_lra_cuteSV2_CHM13.vcf) in the DOCK7 gene that affects 7 transcripts can result in an annotation spanning over 300 characters(here show its position annotation):

*DOCK7:NM_001367561:c.39-23019N>N:(50Exons):Intro1;*

*DOCK7:NM_001272002:c.39-23019N>N:(16Exons):Intro1;*

*DOCK7:NM_001272000:c.39-23019N>N:(49Exons):Intro1;*

*DOCK7:NM_001330614:c.39-23019N>N:(50Exons):Intro1;*

*DOCK7:NM_001271999:c.39-23019N>N:(49Exons):Intro1*

*;DOCK7:NM_001272001:c.39-23019N>N:(48Exons):Intro1*

*;DOCK7:NM_033407:c.39-23019N>N:(49Exons):Intro1;*

In contrast, NAGF can compress this information into a concise DOCK7:8:0,0,0,3,0, which indicates 3% intronic coverage.

### References

1. Shafin, K. et al. Nanopore sequencing and the Shasta toolkit enable efficient de novo assembly of eleven human genomes. Nat. Biotechnol. 38, 1044–1053 (2020).

2. Zook, J. M. et al. Integrating human sequence data sets provides a resource of benchmark SNP and indel genotype calls. Nat. Biotechnol. 32, 246–251 (2014).

3. Zook, J. M. et al. Extensive sequencing of seven human genomes to characterize benchmark reference materials. Sci. Data 3, 160025 (2016).

4. Zook, J. M. et al. An open resource for accurately benchmarking small variant and reference calls. Nat. Biotechnol. 37, 561–566 (2019).

5. Jain, M. et al. Nanopore sequencing and assembly of a human genome with ultra-long reads. Nat. Biotechnol. 36, 338–345 (2018).

6. Fairley, S., Lowy-Gallego, E., Perry, E. & Flicek, P. The International Genome Sample Resource (IGSR) collection of open human genomic variation resources. Nucleic Acids Res. 48, D941–D947 (2020).

7. Rhie, A. et al. The complete sequence of a human Y chromosome. Nature 621, 344–354 (2023).

8. Ren, J. & Chaisson, M. J. P. lra: A long read aligner for sequences and contigs. PLoS Comput. Biol. 17, e1009078 (2021).

9. Li, H. Minimap2: pairwise alignment for nucleotide sequences. Bioinforma. Oxf. Engl. 34, 3094–3100 (2018).

10. Li, H. New strategies to improve minimap2 alignment accuracy. Bioinforma. Oxf. Engl. 37, 4572–4574 (2021).

11. Sedlazeck, F. J. et al. Accurate detection of complex structural variations using single-molecule sequencing. Nat. Methods 15, 461–468 (2018).

12. Jain, C. et al. Weighted minimizer sampling improves long read mapping. Bioinforma. Oxf. Engl. 36, i111–i118 (2020).

13. Jain, C., Rhie, A., Hansen, N. F., Koren, S. & Phillippy, A. M. Long-read mapping to repetitive reference sequences using Winnowmap2. Nat. Methods 19, 705–710 (2022).

14. Jiang, T., Liu, S., Cao, S. & Wang, Y. Structural Variant Detection from Long-Read Sequencing Data with cuteSV. Methods Mol. Biol. Clifton NJ 2493, 137–151 (2022).

15. Chen, Y. et al. Deciphering the exact breakpoints of structural variations using long sequencing reads with DeBreak. Nat. Commun. 14, 283 (2023).

16. Rausch, T. et al. DELLY: structural variant discovery by integrated paired-end and split-read analysis. Bioinforma. Oxf. Engl. 28, i333–i339 (2012).

17. Tham, C. Y. et al. NanoVar: accurate characterization of patients’ genomic structural variants using low-depth nanopore sequencing. Genome Biol. 21, 56 (2020).

18. Cretu Stancu, M. et al. Mapping and phasing of structural variation in patient genomes using nanopore sequencing. Nat. Commun. 8, 1326 (2017).

19. Gong, L. et al. Picky comprehensively detects high-resolution structural variants in nanopore long reads. Nat. Methods 15, 455–460 (2018).

20. Smolka, M. et al. Detection of mosaic and population-level structural variants with Sniffles2. Nat. Biotechnol. (2024) doi:10.1038/s41587-023-02024-y.

21. Heller, D. & Vingron, M. SVIM: structural variant identification using mapped long reads. Bioinforma. Oxf. Engl. 35, 2907–2915 (2019).

22. Lin, J. et al. SVision: a deep learning approach to resolve complex structural variants. Nat. Methods 19, 1230–1233 (2022).

23. Fishilevich, S. et al. GeneHancer: genome-wide integration of enhancers and target genes in GeneCards. Database J. Biol. Databases Curation 2017, bax028 (2017).

24. Geoffroy, V. et al. AnnotSV: an integrated tool for structural variations annotation. Bioinforma. Oxf. Engl. 34, 3572–3574 (2018).

25. Gao, T. & Qian, J. EnhancerAtlas 2.0: an updated resource with enhancer annotation in 586 tissue/cell types across nine species. Nucleic Acids Res. 48, D58–D64 (2020).

26. Kern, F. et al. miRTargetLink 2.0-interactive miRNA target gene and target pathway networks. Nucleic Acids Res. 49, W409–W416 (2021).

27. Nicholas, T. J., Cormier, M. J. & Quinlan, A. R. Annotation of structural variants with reported allele frequencies and related metrics from multiple datasets using SVAFotate. BMC Bioinformatics 23, 490 (2022).

28. den Dunnen, J. T. & Antonarakis, S. E. Nomenclature for the description of human sequence variations. Hum. Genet. 109, 121–124 (2001).
